# Supplementary material for: Draft genome sequence of the rubber tree Hevea brasiliensis
Source: PubMed Central journal article supplement (PMC3575267; doi:10.1186/1471-2164-14-75), 2013-02-02
Supplement: 1471-2164-14-75-S1.pdf [file 1471-2164-14-75-S1.pdf]

**Table S1.** Construction of genomic libraries, generation and filtering of sequencing data used for genomic assembly

| <b>Genome sequencing platform</b> | <b>Library</b>                   | <b>Average length of read (bp)</b> | <b>Total length (Gb)</b> | <b>CLC preliminary assembly</b>            | <b>Newbler preliminary assembly</b>      | <b>Final assembly</b>                    |
|-----------------------------------|----------------------------------|------------------------------------|--------------------------|--------------------------------------------|------------------------------------------|------------------------------------------|
| Illumina                          | fragment size 200 bp; paired end | 100                                | 44.2                     | building basic contigs; connecting contigs | not used                                 | not used                                 |
| Illumina (filtered)*              | fragment size 200 bp; paired end | 100                                | 5.33                     | not used                                   | not used                                 | building contigs; constructing scaffolds |
| Illumina (filtered)*              | fragment size 200 bp; single end | 100                                | 2.05                     | not used                                   | not used                                 | building contigs                         |
| Illumina                          | fragment size 500 bp; paired end | 100                                | 26.9                     | extending contigs; connecting contigs      | not used                                 | not used                                 |
| Illumina (filtered)*              | fragment size 500 bp; paired end | 80                                 | 2.30                     | not used                                   | not used                                 | building contigs; constructing scaffolds |
| Roche/454                         | shotgun; single end              | 316                                | 8.33                     | extending contigs                          | building contigs                         | building contigs                         |
| Roche/454                         | fragment size 8 kb; paired end   | 158                                | 5.69                     | extending contigs; connecting contigs      | building contigs; constructing scaffolds | building contigs; constructing scaffolds |
| Roche/454                         | fragment size 8 kb; single end   | 235                                | 2.50                     | extending contigs                          | building contigs                         | building contigs                         |
| Roche/454                         | fragment size 20kb; paired end   | 148                                | 0.987                    | not used                                   | building contigs; constructing scaffolds | building contigs; constructing scaffolds |
| Roche/454                         | fragment size 20kb; single end   | 229                                | 0.587                    | not used                                   | building contigs                         | building contigs                         |
| SOLiD                             | fragment size 2 kb; paired end   | 41                                 | 3.81                     | connecting contigs                         | not used                                 | not used                                 |
| SOLiD (filtered)*                 | fragment size 2 kb; paired end   | 50                                 | 0.0918                   | not used                                   | not used                                 | building contigs; constructing scaffolds |

\*The Illumina reads were filtered by removing the reads matching repetitive regions, whereas the SOLiD reads were filtered by keeping only the paired reads that were at least 50 bp in length.

**Table S2.** Scaffolds showing the associated genes anchored on to the respective linkage groups based on the reported molecular markers

| <b>Linkage map-g1</b>  |                                                                                                                                                                                                                                                                                                                                                                                                                                                                                                                                                                                                                                                                                                                                                                                                                                                                                                                                                                                                                                     |
|------------------------|-------------------------------------------------------------------------------------------------------------------------------------------------------------------------------------------------------------------------------------------------------------------------------------------------------------------------------------------------------------------------------------------------------------------------------------------------------------------------------------------------------------------------------------------------------------------------------------------------------------------------------------------------------------------------------------------------------------------------------------------------------------------------------------------------------------------------------------------------------------------------------------------------------------------------------------------------------------------------------------------------------------------------------------|
| <b>Scaffold 445443</b> | <p>Serine-threonine protein kinase<br/> Conserved hypothetical protein<br/> Pyruvate kinase, putative<br/> Chitinase<br/> Hevamine<br/> Hypothetical protein<br/> Chitinase<br/> Conserved hypothetical protein<br/> Hypothetical protein<br/> Conserved hypothetical protein<br/> Protein dimerization, putative<br/> ATP binding protein, putative<br/> Conserved hypothetical protein<br/> Ubiquitin conjugating enzyme 2 (E2)<br/> Ethylene-responsive transcription factor, putative<br/> Conserved hypothetical protein<br/> Mitochondrial carrier protein, putative<br/> Conserved hypothetical protein<br/> Tetrahydrofolylpolyglutamate synthase, putative<br/> DNA binding protein, putative<br/> WRKY transcription factor, putative<br/> <b>mHbCIRT9</b><br/> <b>mHbCIRT319</b><br/> RNA polymerase sigma factor rpoD, putative<br/> Conserved hypothetical protein</p> |
| <b>Scaffold 365857</b> | <p>Nuclear movement protein nudc, putative<br/> Hypothetical protein<br/> Hypothetical protein<br/> Polygalacturonase non-catalytic subunit AroGP3 precursor, putative<br/> Predicted protein<br/> <b>mHbCIRA274/380</b><br/> Cap binding protein, putative<br/> Cap binding protein, putative<br/> Hypothetical protein<br/> Hypothetical protein<br/> Thump domain protein, putative</p>                                                                                                                                                                                                                                                                                                                                                                                                                                                                                                                                                                                                                                          |

Thump domain protein, putative  
Hexokinase, putative  
Hexokinase, putative  
Leucine-rich repeat containing protein, putative

#### Scaffold 180784

Trithorax, putative  
Hypothetical protein  
Hypothetical protein  
Hypothetical protein  
ATP binding protein, putative  
Splicing factor 3a, putative  
Glutamate synthase, putative  
Glutamate synthase, putative  
Hypothetical protein  
Conserved hypothetical protein  
Receptor serine/threonine kinase, putative  
Hypothetical protein  
Brassinosteroid Insensitive 1-associated receptor kinase 1 precursor, putative  
Receptor serine/threonine kinase, putative  
Receptor serine/threonine kinase, putative  
Hypothetical protein  
Conserved hypothetical protein  
Brassinosteroid Insensitive 1-associated receptor kinase 1 precursor, putative  
Receptor serine/threonine kinase, putative  
Receptor serine/threonine kinase, putative  
Hypothetical protein  
**mHbCIRA134**  
Conserved hypothetical protein  
Conserved hypothetical protein

#### Scaffold 08981

**hmct22**  
**hmct21**  
Elongation factor 1-beta, putative  
ATP binding protein, putative  
ATP binding protein, putative  
ATP binding protein, putative  
Hypothetical protein  
Conserved oligomeric Golgi complex component, putative  
Conserved oligomeric Golgi complex component, putative  
Polcalcine Jun o, putative  
Cycloeucaleenol cycloisomerase, putative  
Cycloeucaleenol cycloisomerase, putative  
Leucine-rich repeat protein, putative  
Nucleolar protein nop56, putative  
Adenylate kinase 1, putative  
Aspartyl aminopeptidase, putative

Predicted protein  
**mHbCIRA2684**  
Conserved hypothetical protein

**Scaffold 175245**

**mHbCIRTAs2455**

**Scaffold 125722**

**mHbCIRTAs2557**  
Hypothetical protein

**Scaffold 416894**

Conserved hypothetical protein  
Hypothetical protein  
Hypothetical protein  
**mHbCIRA200**

**Scaffold 412180**

Conserved hypothetical protein  
Conserved hypothetical protein  
Conserved hypothetical protein  
Glutamate decarboxylase, putative  
**mHbCIRA 2748**  
1-aminocyclopropane-1-carboxylate deaminase, putative  
1-aminocyclopropane-1-carboxylate deaminase, putative  
Conserved hypothetical protein  
Homeodomain-leucine zipper protein hd4  
Organic anion transporter, putative  
Organic anion transporter, putative

---

**Linkage map-g2**

**Scaffold 416254**

Protein P21, putative  
Conserved hypothetical protein  
RNA polymerase II ctd phosphatase, putative  
Predicted protein  
Conserved hypothetical protein  
Predicted protein  
RNA binding protein, putative  
RNA binding protein, putative  
Hypothetical protein  
Serine carboxypeptidase, putative  
Predicted protein  
Pentatricopeptide repeat-containing protein, putative  
Pentatricopeptide repeat-containing protein, putative  
Conserved hypothetical protein  
Predicted protein  
ATP binding protein, putative  
ATP binding protein, putative  
**mHbCIRA 2348**  
Predicted protein

Conserved hypothetical protein  
Histone-lysine n-methyltransferase, suvh, putative  
Conserved hypothetical protein  
RNA-binding protein, putative  
Hypothetical protein  
Conserved hypothetical protein  
AP2 domain transcription factor RAP2.3, putative  
AP2 domain transcription factor RAP2.3, putative  
Zinc finger protein, putative  
Predicted protein  
Ubiquinol-cytochrome C reductase iron-sulfur subunit, putative  
Aspartate semialdehyde dehydrogenase, putative  
Predicted protein  
Transaldolase, putative  
Cytochrome P450, putative  
Predicted protein  
Pentatricopeptide repeat-containing protein, putative  
Predicted protein  
Predicted protein  
Transferase, transferring glycosyl groups, putative  
Conserved hypothetical protein  
Conserved hypothetical protein  
40S ribosomal protein S27, putative  
Diphosphoinositol polyphosphate phosphohydrolase, putative

#### Scaffold 272663

Cationic amino acid transporter, putative  
Cationic amino acid transporter, putative  
BTB and MATH domain-containing protein, putative  
BTB and MATH domain-containing protein, putative  
Conserved hypothetical protein  
Conserved hypothetical protein  
Sterol regulatory element-binding protein site 2 protease, putative  
Set domain protein, putative  
LOB domain-containing protein, putative  
Histone ubiquitination proteins group (HUPB902)  
Conserved hypothetical protein  
Membrin, putative  
HSP90 co-chaperone, putative  
Conserved hypothetical protein  
BTB/POZ domain-containing protein KCTD9, putative  
BTB/POZ domain-containing protein KCTD9, putative  
Serine/threonine-protein kinase ripk4, putative  
Vitamin-b12 independent methionine synthase  
5-methyltetrahydropteroyltriglutamate  
Predicted protein  
Early nodulin 55-2 precursor, putative

Early nodulin 55-2 precursor, putative  
Early nodulin 55-2 precursor, putative  
Early nodulin 55-2 precursor, putative  
Mavicyanin, putative  
Predicted protein  
Conserved hypothetical protein  
Annexin, putative  
Predicted protein  
Conserved hypothetical protein  
**gSSR096**  
Conserved hypothetical protein  
Conserved hypothetical protein  
Conserved hypothetical protein  
Hydrolase, hydrolyzing O-glycosyl compounds, putative  
Hydrolase, hydrolyzing O-glycosyl compounds, putative  
ATECP63, putative  
Syntaxin, putative  
Syntaxin, putative  
Predicted protein  
**hmct4**  
Conserved hypothetical protein  
Catalytic, putative  
Importin beta-3, putative  
**mHbCIRA2534**  
Importin beta-3, putative  
Conserved hypothetical protein  
Hypothetical protein  
Tubulin alpha chain, putative  
Eukaryotic translation initiation factor 4e type, putative  
Predicted protein  
Conserved hypothetical protein  
Conserved hypothetical protein  
Adenylsulfate kinase, putative

#### Scaffold 335127

AMP dependent ligase, putative  
AMP dependent ligase, putative  
Conserved hypothetical protein  
**mHbCIRA 2368**  
Transcription regulator, putative  
Transferase, putative  
Transferase, putative  
3'-N-debenzoyl-2'-deoxytaxol N-benzoyltransferase, putative  
Predicted protein

#### Scaffold 586014

**mHbCIRA2734**

**Scaffold 59282****mHbCIRA2510**

Hypothetical protein  
Expressed protein, putative  
Blue copper protein precursor, putative  
Conserved hypothetical protein  
Hypothetical protein  
26S proteasome regulatory subunit S3, putative  
Predicted protein  
Predicted protein  
Predicted protein  
Predicted protein  
Hypothetical protein

**Scaffold 421682****mHbCIRT2140**

DNA-binding protein MNB1B, putative  
Protein binding protein, putative  
Conserved hypothetical protein  
Predicted protein  
Vacuolar cation/proton exchanger 1a, putative  
Conserved hypothetical protein  
*Hevea brasiliensis* isolate SSH47 sequence  
Predicted protein  
Conserved hypothetical protein  
Ubiquitin-protein ligase, putative  
Ethylene-inducible protein (ER1)  
Symplekin, putative  
**hmct40**  
Predicted protein

**Scaffold 349088**

Hypothetical protein  
Predicted protein  
**mHbCIRA2381**  
**mHbCIRA2326**  
Conserved hypothetical protein  
Conserved hypothetical protein

**Scaffold 222405****mHbCIRt283****Linkage map-g3****Scaffold 174498**

DNA-directed RNA polymerase, putative  
**mHbCIRA278**

**Scaffold 453132**

Predicted protein  
Hypothetical protein  
DNA-repair protein xrcc1, putative

NMDA receptor-regulated protein, putative  
 NMDA receptor-regulated protein, putative  
 Ring finger protein, putative  
 Cysteine protease, putative  
 Cysteine protease, putative  
 Hypothetical protein  
 Myristoyl-acyl carrier protein thioesterase, chloroplast precursor, putative  
 Myristoyl-acyl carrier protein thioesterase, chloroplast precursor, putative  
 ATP-dependent transporter, putative  
 Auxin-responsive protein IAA1, putative  
 Hypothetical protein  
 Hypothetical protein  
 Predicted protein  
 Glutathione S-transferase omega  
 Oxalate/formate antiporter  
 Aspartate aminotransferase, putative  
**mHbCIRTAs2558**  
 Aspartate aminotransferase, putative  
 Katanin p60 ATPase-containing subunit, putative  
**gHbCIRA2415**  
 Katanin p60 ATPase-containing subunit

**Scaffold 263548**

**gHbCIRA2516**  
**mHbCIRA156**  
 Transportin-3, putative

**Scaffold 93599**

Predicted protein  
 Electron transporter, putative  
**hmct21**  
**hmct22**  
**mHbCIRA2485**  
 Hypothetical Protein

**Scaffold 305576**

**hmct22**  
**hmct21**  
**mHbCIRTAs2697**

**Scaffold 198002**

Conserved Hypothetical Protein  
**mHbCIRBAC123d05**  
**hmct43**  
 Conserved hypothetical protein  
 Conserved hypothetical protein

**Scaffold 181532**

**mHbCIRA2264**  
 Calreticulin-3-like

**Scaffold 170728**

Transcription factor RF2a, putative  
Electron transfer flavoprotein-ubiquinone oxidoreductase  
**mHbCIRA2707**  
Electron transfer flavoprotein-ubiquinone oxidoreductase, putative  
Predicted protein strictosidine synthase, putative

**Scaffold 197224**

Protein binding protein, putative  
Predicted protein  
Phospholipid:diacylglycerol acyltransferase 2 (PDAT2)  
RNA splicing protein mrs2, mitochondrial, putative  
**mHbCIRA2749**  
srpk, putative

---

**Linkage map-g4**

---

**Scaffold 131572**

Ethylene-responsive element binding protein 1 (EREBP1)  
FAD NAD binding oxidoreductases, putative  
AP2/ERF domain-containing transcription factor (ERF43)  
Serine-threonine protein kinase, plant-type, putative  
**mHbCIRA2706**  
Predicted protein  
Auxin-repressed protein-like protein ARP1  
Ring finger protein, putative

**Scaffold 138950**

Receptor protein kinase CLAVATA1 precursor, putative  
Conserved hypothetical protein  
**mHbCIRTA2157**  
Conserved hypothetical protein  
**mHbCIRT2091**  
Conserved hypothetical protein  
Protein binding protein, putative  
Predicted protein  
Predicted protein

**Scaffold 541370**

**mHbCIRA2766**

**Scaffold 430947**

DNA repair protein reca, putative  
DNA repair protein reca, putative  
Nucleosome assembly protein, putative  
Hypothetical protein  
Regulatory protein NPR1, putative  
Hypothetical Protein  
Calmodulin binding protein, putative  
**mHbCIRA385**  
Hypothetical Protein  
Casein kinase, putative

Conserved hypothetical protein  
Diacylglycerol acyltransferase 1 (DGAT-1)  
Dead box ATP-dependent RNA helicase, putative  
n-myristoyl transferase, putative  
DNA binding protein, putative  
Lycopene epsilon cyclase, chloroplast precursor, putative  
Lycopene epsilon cyclase, chloroplast precursor, putative  
Predicted protein  
Conserved hypothetical protein

#### Scaffold 287934

S-receptor kinase, putative  
L-ascorbate peroxidase 1, cytosolic, putative  
Conserved hypothetical protein  
grr1, plant, putative  
Conserved hypothetical protein  
Phospholipase d alpha, putative  
**Hbtnr-50**  
DNA binding protein, putative  
Multidrug resistance pump, putative  
Beta-glucosidase, putative  
RNA-dependent RNA polymerase, putative  
Xenotropic and polytropic murine leukemia virus receptor ids-4, putative  
Conserved hypothetical protein  
Predicted protein  
Conserved hypothetical protein  
Conserved hypothetical protein  
Triose phosphate chloroplast precursor, putative  
**mbHCIRTAs2277**  
ATPase n2b, putative  
Predicted protein  
ADP,ATP carrier protein, putative  
ADP,ATP carrier protein, putative  
Conserved hypothetical protein  
Cellulose synthase A catalytic subunit 6 [UDP-forming], putative  
**Hbtnr-75**  
**Hbtnr-101**  
Conserved hypothetical protein  
Conserved hypothetical protein  
Hypothetical protein  
Protein With Unknown Function  
tso1, putative  
Acyl-protein thioesterase, putative  
**mHbCIRT93**  
Peptidyl-prolyl cis-trans isomerase, putative  
Ammonium transporter, putative  
DNA (cytosine-5)-methyltransferase, putative

Arabidopsis lyrata subsp. lyrata hypothetical protein  
Hypothetical protein  
Predicted Protein  
ran, putative  
Conserved hypothetical protein  
Ubiquinol-cytochrome C reductase complex 14 kda protein  
Potassium channel AKT6, putative  
Boron transporter, putative  
Conserved hypothetical protein  
WD-repeat protein, putative  
Conserved hypothetical protein  
Conserved hypothetical protein  
Conserved hypothetical protein  
Anthocyanidin synthase (ANS1)  
Glycerate dehydrogenase, putative

---

### Linkage map-g5

---

#### Scaffold 123369

Arginine/Serine-rich splicing factor, putative  
CCD1, putative  
FAD NAD binding oxidoreductases, putative  
Kinase, putative  
Kinase, putative  
Conserved hypothetical protein  
Predicted protein  
Ubiquitin-protein ligase, putative  
ORMDL, putative  
Predicted protein  
WD-repeat protein, putative  
**mHbCIRa460**  
Predicted protein (MYB201)  
Predicted protein  
Laccase, putative  
Laccase, putative  
Conserved hypothetical protein  
Beta-fructofuranosidase, putative  
Beta-fructofuranosidase, putative  
Beta-fructofuranosidase, putative  
Conserved hypothetical protein  
Conserved hypothetical protein  
Auxin response factor, putative  
Importin-alpha re-exporter, putative  
AP2/ERF domain-containing transcription factor (DREB56)  
Conserved hypothetical protein  
DNA binding protein, putative  
Predicted protein  
Flavonoid 3-hydroxylase, putative

**gHbCIRA2737**

Aspartic proteinase nepenthesin-1 precursor, putative  
Ubiquitin ligase SINAT3, putative  
Ubiquitin ligase SINAT3, putative  
Dynamin, putative  
Conserved hypothetical protein  
Conserved hypothetical protein  
Conserved hypothetical protein  
Dopamine beta-monoxygenase, putative  
Eukaryotic translation initiation factor 3 subunit, putative  
Eukaryotic translation initiation factor 3 subunit, putative

**gHbCIRT2636**

Trithorax, putative  
RING-H2 finger protein ATL3K, putative  
RING-H2 finger protein ATL3K, putative

**mbHCIRTAs 2559**

Hypothetical protein  
Beclin-1, putative  
Predicted protein  
Hypothetical protein  
Cyclic nucleotide-gated ion channel, putative  
Predicted protein  
Dead box ATP-dependent RNA helicase, putative  
Hypothetical protein  
Triacylglycerol lipase, putative  
Conserved hypothetical protein  
Pentatricopeptide repeat-containing protein, putative  
Chitinase, putative  
Chitinase, putative  
Histone H3 (HTR904)

**Scaffold 274716**

Pectinesterase-2 precursor, putative  
Pectinesterase, putative  
Pentatricopeptide repeat-containing protein, putative  
Carboxypeptidase regulatory region-containing protein, putative  
Carboxypeptidase regulatory region-containing protein, putative  
Conserved hypothetical protein  
Hypothetical protein  
Conserved hypothetical protein  
**mHbCIRTAs2186**  
Kinase, putative  
Enzyme inhibitor, putative  
Protein binding protein, putative  
Predicted protein  
WRKY transcription factor 3

|                        |                                                                                                                                                                                                                                                                                                                                                                                                                                                                                                                                                                                                                                                                                                                                                                                                                                                                                                                                                                                                              |
|------------------------|--------------------------------------------------------------------------------------------------------------------------------------------------------------------------------------------------------------------------------------------------------------------------------------------------------------------------------------------------------------------------------------------------------------------------------------------------------------------------------------------------------------------------------------------------------------------------------------------------------------------------------------------------------------------------------------------------------------------------------------------------------------------------------------------------------------------------------------------------------------------------------------------------------------------------------------------------------------------------------------------------------------|
| <b>Scaffold 127481</b> | <b>mHbCIRA36</b>                                                                                                                                                                                                                                                                                                                                                                                                                                                                                                                                                                                                                                                                                                                                                                                                                                                                                                                                                                                             |
| <b>Scaffold 297292</b> | <b>mHbCIRA 2745</b><br>Carboxy-terminal kinesin, putative<br>Carboxy-terminal kinesin, putative<br><b>gHbCIRTAs2724</b>                                                                                                                                                                                                                                                                                                                                                                                                                                                                                                                                                                                                                                                                                                                                                                                                                                                                                      |
| <b>Scaffold 129112</b> | <b>mHbCIRA2509</b><br>Serine-threonine protein kinase, plant-type, putative                                                                                                                                                                                                                                                                                                                                                                                                                                                                                                                                                                                                                                                                                                                                                                                                                                                                                                                                  |
| <b>Scaffold 25532</b>  | <b>mHbCIRA2518</b>                                                                                                                                                                                                                                                                                                                                                                                                                                                                                                                                                                                                                                                                                                                                                                                                                                                                                                                                                                                           |
| <b>Scaffold 53705</b>  | Methylcobalamin:com methyltransferase, putative<br><b>mHbCIRT2603</b>                                                                                                                                                                                                                                                                                                                                                                                                                                                                                                                                                                                                                                                                                                                                                                                                                                                                                                                                        |
| <b>Linkage map-g6</b>  |                                                                                                                                                                                                                                                                                                                                                                                                                                                                                                                                                                                                                                                                                                                                                                                                                                                                                                                                                                                                              |
| <b>Scaffold 227539</b> | <b>mHbCIRa296</b><br>ATP binding protein, putative                                                                                                                                                                                                                                                                                                                                                                                                                                                                                                                                                                                                                                                                                                                                                                                                                                                                                                                                                           |
| <b>Scaffold 588071</b> | Hypothetical protein<br>Type II inositol 5-phosphatase, putative<br>Beta-hexosaminidase, putative<br>Predicted protein<br><b>mHbCIRa 367</b><br>Pentatricopeptide repeat-containing protein, putative<br>Pentatricopeptide repeat-containing protein, putative<br>Serine-threonine protein kinase, plant-type, putative<br>Endo-1,4-beta-glucanase, putative<br>Latex cyanogenic beta glucosidase<br>Latex cyanogenic beta glucosidase<br>Type II inositol 5-phosphatase, putative<br>Predicted protein<br>Pentatricopeptide repeat-containing protein, putative<br>Type II inositol 5-phosphatase, putative<br>Cohesin subunit rad21, putative<br><b>mHbCIRa2391</b><br>Splicing factor U2AF-associated protein, putative<br>Latex cyanogenic beta glucosidase<br>Type II inositol 5-phosphatase, putative<br>Predicted protein<br>Beta-hexosaminidase, putative<br>Acetolactate synthase, putative<br>Leucine zipper-ef-hand containing transmembrane protein, putative<br>Cohesin subunit rad21, putative |

**Scaffold 163591**

Signal recognition particle receptor subunit beta, putative  
Conserved hypothetical protein  
Conserved hypothetical protein  
Axial regulator YABBY4, putative  
Hypothetical protein  
ATP binding protein, putative  
Nucleic acid binding protein, putative  
Conserved hypothetical protein  
Conserved hypothetical protein  
Pyroglutamyl-peptidase I, putative  
Pentatricopeptide repeat-containing protein, putative  
Polygalacturonase precursor, putative  
**mHbCIRa 170**  
Polygalacturonase, putative  
Phosphatidylinositol 3-kinase class, putative  
Phosphatidylinositol 3-kinase class, putative  
Phosphatidylinositol 3-kinase class, putative

**Scaffold 228549**

Predicted protein (MYB)  
Predicted protein  
**mHbCIRA2498**  
ATATH13, putative  
Conserved hypothetical protein  
Conserved hypothetical protein  
Nuclease, putative  
Nucleoside transporter, putative  
Conserved hypothetical protein  
Conserved hypothetical protein  
Predicted protein  
Splicing endonuclease positive effector sen1, putative  
Conserved hypothetical protein  
Conserved hypothetical protein  
Glutaredoxin S12  
Monooxygenase, putative  
Monooxygenase, putative  
Myosin XI, putative

**Scaffold 186880**

**mHbCIRA2398**

**Scaffold 187443**

**mHbCIRA2511**

**Scaffold 114815**

Structural constituent of cell wall, putative  
Predicted protein  
Magnesium-dependent phosphatase 1-like  
ATP binding protein, putative

Hypothetical protein  
 Conserved hypothetical protein  
 ATP binding protein, putative  
 Cysteine-type endopeptidase, putative  
**mHbCIRA2406**  
 ATP binding protein, putative  
 ATP binding protein, putative  
 Conserved hypothetical protein  
 Hypothetical protein  
 Conserved hypothetical protein

---

**Linkage map-g7**

---

**Scaffold 122409**

Serine/threonine protein kinase, putative  
 Ubiquitin-protein ligase, putative  
**mHbCIRTAs2743**  
 Protein G10, putative  
 ATP-binding cassette transporter, putative  
 ATP-binding cassette transporter, putative  
 Starch branching enzyme II, putative  
 Starch branching enzyme II, putative  
**gHbCIRA2758**  
 Conserved hypothetical protein  
 Predicted protein

**Scaffold 224310**

**mHbCIRA2708**

**Scaffold 146047**

tRNA (guanine-n(7)-)-methyltransferase, putative  
 Remorin, putative  
 Pentatricopeptide repeat-containing protein, putative  
 GTP-binding protein tya/bipa, putative  
**mHbCIRA2429**  
 Predicted protein  
 Calcium-dependent protein kinase (CDPK1)

**Scaffold 238809**

Conserved hypothetical protein  
 Villin 1-4, putative  
**g15mHbCIRA295**  
 Predicted protein  
 Insulin-degrading enzyme, putative

**Scaffold 416082**

**gHbCIRA2763**

Signal peptidase I, putative  
**hmct21**

**Scaffold 463202**

Predicted protein  
Proliferation-associated 2g4, putative  
Proliferation-associated 2g4, putative  
**mHbCIRA2686**  
Conserved hypothetical protein  
Glutaredoxin, grx, putative  
Glutaredoxin, grx, putative

**Scaffold 519782**

**mHbCIRT2115**

**Scaffold 93102**

Phospholipase C 3 precursor, putative  
Conserved hypothetical protein  
Protein binding protein, putative  
**mHbCIRA2762**  
Deoxyribonuclease, putative  
DNA-binding protein smubp-2, putative  
Conserved hypothetical protein  
Transcription regulator, putative

---

**Linkage map-g8**

---

**Scaffold 231182**

**mHbCIRA2442**  
Conserved hypothetical protein  
Probable membrane-associated kinase regulator 1-like

**Scaffold 161238**

Ubiquitin-associated uba/ubx domain-containing protein, putative  
TBC1 domain family member  
DUF246 Domain-containing protein At1g04910-like  
Conserved hypothetical protein  
Pentatricopeptide repeat-containing protein, putative  
Anthranilate N-benzoyltransferase protein, putative  
Arp2/3 complex 20 kd subunit, putative  
Histidine kinase-, DNA gyrase B-, and HSP90-like ATPase family protein (NOV)  
**mHbCIRa251**  
Histidine kinase-, DNA gyrase B-, and HSP90-like ATPase family protein (NOV)  
Alkaline phytoceramidase, putative  
Methionine-tRNA synthetase, putative  
Beta-galactosidase, putative  
Conserved hypothetical protein  
Ubiquitin-protein ligase, putative  
Conserved hypothetical protein  
Non-imprinted in Prader-Willi/Angelman syndrome region protein, putative  
Conserved hypothetical protein  
Chaperone protein dnaJ 20, chloroplast precursor, putative

**hmct40**

**Scaffold 417274**

Chromatin remodeling complex subunit (CHR952)  
**mHbCIRT73**  
Mom(plant), putative  
Hypothetical protein  
Mom(plant), putative  
Conserved hypothetical protein  
Glycosyltransferase, cazy family GT8  
Conserved hypothetical protein

**Scaffold 354160**

Nuclear inhibitor of protein phosphatase-1, putative  
Nuclear inhibitor of protein phosphatase-1, putative  
**mHbCIRT686**  
Nuclear inhibitor of protein phosphatase-1, putative

**Scaffold 235226**

Calcium ion binding protein, putative  
Glutamate receptor 2 plant, putative  
Hypothetical protein  
Glutamate receptor 2 plant, putative  
Predicted protein  
Predicted protein  
Homogentisate 1,2-dioxygenase, putative  
Hypothetical protein  
Ring finger protein, putative  
**mHbCIRT2542**  
RNA exonuclease, putative

**Scaffold 328348**

Processing protein PRP40, putative  
**mHbCIRT2635**  
Processing protein PRP40, putative

**Scaffold 136822**

Predicted protein  
**mHbCIRa120**  
Hypothetical protein

**Scaffold 488663**

**mHbCIRT730**  
Phospholipid:diacylglycerol acyltransferase 1-2 (PDAT1-2)

**Scaffold 412100**

Transcription factor, putative  
Transcription factor, putative  
Transcription factor, putative  
**M630**  
ATP-dependent clp protease ATP-binding subunit clpx, putative  
ATP-dependent clp protease ATP-binding subunit clpx, putative  
Transcription factor, putative

Conserved hypothetical protein  
Predicted protein  
Nitrate transporter, putative  
Nitrate transporter, putative  
CDK-activating kinase  
cak1, putative  
Sugar transporter, putative  
Predicted protein  
Transcription factor, putative  
3-hydroxyacyl-CoA dehydrogenase, putative  
Conserved hypothetical protein  
Multidrug resistance pump, putative  
Multidrug resistance pump, putative  
Conserved hypothetical protein  
Aspartate aminotransferase, putative  
Predicted protein  
Hypothetical protein  
Cytoplasmic dynein light chain, putative  
Conserved hypothetical protein  
Hypothetical protein  
Pentatricopeptide repeat-containing protein, putative

---

### Linkage map-g9

---

#### Scaffold 89544

**mHbCIRTA2244**  
**hmct40**  
**mHbCIRA2298**  
DNA binding protein, putative  
Homeobox protein, putative

#### Scaffold 124084

Brassinosteroid Insensitive 1-associated receptor kinase 1 precursor, putative  
**mHbCIRA2744**

#### Scaffold 139710

Dolichyl-diphosphooligosaccharide--protein glycosyltransferase, putative  
tRNA delta(2)-isopentenylpyrophosphate transferase, putative  
Lipid binding protein, putative  
Lysophosphatidic acid acyltransferase, putative  
Conserved hypothetical protein  
Conserved hypothetical protein  
Multidrug resistance pump, putative  
Multidrug resistance pump, putative  
4-hydroxy-3-methylbut-2-enyl diphosphate reductase  
NAD dependent epimerase/dehydratase, putative  
NAD dependent epimerase/dehydratase, putative  
S-adenosylmethionine-dependent methyltransferase, putative  
S-adenosylmethionine-dependent methyltransferase, putative  
**mHbCIRa104**

Protein ariadne-1, putative  
Conserved hypothetical protein  
Non-symbiotic hemoglobin, putative  
Non-symbiotic hemoglobin, putative  
Conserved hypothetical protein  
Hypothetical protein

#### Scaffold 199300

**mHbCIRA2689**

#### Scaffold 412552

Predicted protein  
Transcriptional regulator SUPERMAN, putative  
**mHbCIRTAs2178**  
Transcriptional regulator SUPERMAN, putative  
Ethylene receptor, putative  
DNA binding protein, putative  
Protein transporter, putative  
Hypothetical protein  
DNA repair helicase rad5,16, putative  
DNA repair helicase rad5,16, putative  
Conserved hypothetical protein  
Conserved hypothetical protein  
Desacetoxyvindoline 4-hydroxylase, putative  
Outward rectifying K<sup>+</sup> channel (KCO1)  
1-aminocyclopropane-1-carboxylate oxidase homolog 12-like  
Desacetoxyvindoline 4-hydroxylase, putative  
Conserved hypothetical protein  
Auxin-induced protein 5NG4, putative  
DNA binding protein, putative  
Predicted protein

#### Scaffold 411125

ATP binding protein, putative  
ATP binding protein, putative  
**gHbCIRA2522**  
**mHbCIRA2432**  
Eukaryotic translation initiation factor 2c, putative  
Eukaryotic translation initiation factor 2c, putative

#### Scaffold 128180

ATP binding protein, putative  
Conserved hypothetical protein  
Conserved hypothetical protein  
Zinc finger protein, putative  
Predicted protein  
Lipase  
Predicted protein  
Helicase, putative  
Receptor serine-threonine protein kinase, putative

Receptor serine-threonine protein kinase, putative  
 Glutaredoxin, grx, putative  
 Acyl-coa binding protein, putative  
 Anaphase promoting complex subunit, putative  
 Anaphase promoting complex subunit, putative  
 Predicted protein  
 Tonneau, putative  
 Serine/threonine protein kinase, putative  
 Spo0B-associated GTP-binding protein, putative  
 DNA binding protein, putative  
 Nucleic acid binding protein, putative  
 Always early, putative  
**mHbCIRA2682**  
 Always early, putative  
 AMP-activated protein kinase, gamma regulatory subunit, putative  
 Hypothetical protein  
 Hypothetical protein  
 Pentatricopeptide repeat-containing protein, putative  
 Flavonol synthase/flavanone 3-hydroxylase, putative  
 Cullin-1, putative  
 Plastid CUL1 (CUL1)

---

**Linkage map-g10**

**Scaffold 121193**

**mHbCIRA2408**

**Scaffold 431381**

SAUR family protein (SAUR23)  
 Calcium-dependent protein kinase, putative  
 Calcium-dependent protein kinase, putative  
 Calcium-dependent protein kinase, putative  
 Conserved hypothetical protein  
**mHbCIRA2767**  
 Conserved hypothetical protein  
**gHbCIRA2510**  
 Predicted protein  
 Predicted protein  
 Conserved hypothetical protein  
 Predicted protein  
**hmac3**

**Scaffold 601618**

**Hbtnr-46**

**Hbtnr-91**

Cytochrome P450, putative  
 Cytochrome P450, putative  
 Cytochrome P450, putative  
 Heat shock protein binding protein  
 Predicted protein

**gHbCIRA2317**  
Amino acid binding protein, putative  
**mHbCIRA2320**

**Scaffold 106428**

**mHbCIRA2425**

**Scaffold 297920**

Protein ABIL2, putative  
Hypothetical protein  
Hypothetical protein  
Predicted protein  
Cdk8, putative  
Transcription factor, putative  
**mHbCIRT2096**

**Scaffold 410607**

Transducin/WD40 domain-containing protein-like protein (AT4G14310)  
Structural molecule, putative  
**mHbCIRa214**  
Kinesin heavy chain, putative  
Desiccation-associated protein (MTR\_2g077860)  
Glycolipid transfer protein, putative  
Conserved hypothetical protein  
60S ribosomal protein L14, putative  
Protein phosphatase 2c, putative  
Conserved hypothetical protein  
Conserved hypothetical protein  
Kinesin light chain, putative  
Conserved hypothetical protein  
**mHbCIRT2668**

**Scaffold 151685**

**mHbCIRA2316**  
WRKY transcription factor, putative

**Scaffold 168316**

Sodium-bile acid cotransporter, putative  
**mHbCIRA2388**

**Scaffold 237846**

Vam6/Vps39-like protein-like  
Conserved hypothetical protein  
Conserved hypothetical protein  
Protein FAM96B, putative  
Transporter, putative  
Chitin-inducible gibberellin-responsive protein, putative  
Succinate dehydrogenase, putative  
Steroid 22-alpha hydroxylase (DWF4)  
Steroid 22-alpha hydroxylase (DWF4)  
Hypothetical protein  
ISWI chromatin remodeling complex ATPase ISW1, putative

Conserved hypothetical protein  
 U1 small nuclear ribonucleoprotein 70 kDa, putative  
 maf protein, putative  
 Somatic embryogenesis receptor kinase, putative  
 Conserved hypothetical protein  
 Acidic leucine-rich nuclear phosphoprotein 32-related protein-like  
 Sugar transporter, putative  
**mHbCIRA2702**  
 Predicted protein  
**hmct40**  
 Sugar transporter, putative  
 Conserved hypothetical protein  
 Glutamyl-trna synthetase 1, 2, putative  
 TPR repeat-containing thioredoxin TTL1-like  
 Tetratricopeptide-repeat thioredoxin-like 4 protein (TTL4)

#### Scaffold 415719

ATP-binding cassette transporter, putative  
 Conserved hypothetical protein  
 Vacuolar cation/proton exchanger 1a, putative  
 NudC domain-containing protein, putative  
 Kinase, putative  
 ATP binding protein, putative  
 Conserved hypothetical protein  
 Cyclophilin, putative  
 Ubiquitin-protein ligase, putative  
 Pyridoxin biosynthesis protein PDX1, putative  
 1-phosphatidylinositol-4,5-bisphosphate phosphodiesterase, putative  
 1-phosphatidylinositol-4,5-bisphosphate phosphodiesterase, putative  
 1-phosphatidylinositol-4,5-bisphosphate phosphodiesterase, putative  
 1-phosphatidylinositol-4,5-bisphosphate phosphodiesterase, putative  
 Transcription factor, putative  
 Conserved hypothetical protein  
 Omega-3 fatty acid desaturase (Fad3)  
 Omega-3 fatty acid desaturase, endoplasmic reticulum, putative  
 Hypothetical protein  
 Selt-like protein-like  
 Serine-threonine protein kinase, plant-type, putative  
 Tonoplast intrinsic protein, putative  
 Predicted protein  
 Alpha-galactosidase/alpha-n-acetylgalactosaminidase, putative  
 Pentatricopeptide repeat-containing protein, putative  
 Conserved hypothetical protein  
 Putative integral membrane protein conserved region

Conserved hypothetical protein  
Conserved hypothetical protein  
ATP-binding cassette transporter, putative  
Histone deacetylase, putative  
Histone deacetylase, putative  
Protein transport protein sec23, putative  
Protein transport protein sec23, putative  
**mHbCIRTAs2196**  
Protein transport protein sec23, putative  
Taz protein, putative  
Calmodulin binding protein, putative  
Gibberellin 3-beta-dioxygenase, putative  
Serine-threonine protein kinase, plant-type, putative  
Conserved hypothetical protein  
Cucumisin precursor, putative  
Cucumisin precursor, putative  
Conserved hypothetical protein  
Type 2 diacylglycerol acyltransferase (DGAT2)  
Type 2 diacylglycerol acyltransferase (DGAT2)  
FAR1-RELATED SEQUENCE 5-like  
FAR1-RELATED SEQUENCE 5-like  
Auxin:hydrogen symporter, putative  
Auxin:hydrogen symporter, putative

#### Scaffold 172714

Histidine-containing phosphotransfer protein, putative  
Serine-threonine protein kinase, plant-type, putative  
Pentatricopeptide repeat-containing protein, putative  
Bsu-protein phosphatase, putative  
Stromal antigen, putative  
Stromal antigen, putative  
NPL4-like protein 1-like  
GTPase activating protein, putative  
Conserved hypothetical protein  
RNA binding protein, putative  
U1 small nuclear ribonucleoprotein C, putative  
**mHbCIRA157**  
U1 small nuclear ribonucleoprotein C, putative  
F-box/kelch-repeat protein (MTR\_2g015760)  
Conserved hypothetical protein  
Short chain alcohol dehydrogenase, putative  
Shikimate dehydrogenase, putative  
Predicted protein  
Transcription factor, putative  
Transcription factor, putative  
Serine endopeptidase degp2, putative  
Monooxygenase, putative

Predicted protein  
Conserved hypothetical protein

**Scaffold 284371**

**mHbCIRA2392**  
Big map kinase/bmk, putative

**Scaffold 429519**

Hypothetical protein  
DNA binding protein, putative  
Ubiquitin-conjugating enzyme h, putative  
Chromo domain protein, putative  
Latex beta-cyanoalanine synthase  
Conserved hypothetical protein  
Hypothetical protein  
Conserved hypothetical protein  
Cytochrome p450, putative  
Sialin, putative  
Sialin, putative  
Ubiquitin-protein ligase, putative  
Minor histocompatibility antigen H13, putative  
Receptor protein kinase, putative  
Pentatricopeptide repeat-containing protein, putative  
Receptor protein kinase, putative  
Receptor protein kinase, putative  
Conserved hypothetical protein  
Conserved hypothetical protein  
Conserved hypothetical protein  
CRP, putative  
**mHbCIRA2730**  
Rop guanine nucleotide exchange factor, putative  
Pentatricopeptide repeat-containing protein, putative  
Pentatricopeptide repeat-containing protein, putative  
Gibberellin 20-oxidase, putative  
Transcription factor, putative  
Beta-amylase, putative  
Beta-amylase, putative  
Calmodulin-binding heat-shock protein, putative  
60S ribosomal protein L36e, putative  
Acyl-CoA thioesterase, putative  
Protein AFR, putative  
Conserved hypothetical protein  
Hypothetical protein  
DMT1 gene for chloroplast-resident DNA methyltransferase  
Receptor protein kinase, putative  
DNA binding protein, putative  
Kiwellin, putative  
Kiwellin, putative

Synaptotagmin, putative  
 Actin depolymerizing factor, putative  
 KDEL motif-containing protein 1 precursor, putative  
 KDEL motif-containing protein 1 precursor, putative  
 Double-stranded RNA-specific adenosine deaminase  
 tRNA-specific adenosine deaminase 1-like  
 Remorin, putative  
 R2R3-MYB transcription factor, putative  
**gHbCIRA2741**  
 Dead box ATP-dependent RNA helicase, putative  
 Acetyl-coenzyme A carboxylase carboxyl transferase alpha, putative  
 Conserved hypothetical protein

---

**Linkage map-g11**

---

**Scaffold 492213**

**mHbCIRBAC83E19**

**Scaffold 201737**

Calmodulin binding protein, putative  
**mHbCIRTAs2260**

**Scaffold 280583**

**mHbCIRa268**

**Scaffold 158826**

**mHbCIRA2736**  
 fkbp-rapamycin associated protein, putative

**Scaffold 45077**

ADP-ribosylation factor, putative  
**mHbCIRA2536**  
 Transcription factor, putative

**Scaffold 25873**

**mHbCIRA297**

**Scaffold 438547**

**mHbCIRa2535**  
 Glycoprotein 3-alpha-l-fucosyltransferase A, putative  
 Molybdopterin-binding, putative  
 Molybdopterin-binding, putative

---

**Linkage map-g12**

---

**Scaffold 130216**

Hedgehog receptor, putative  
**mHbCIRA2484**

**Scaffold 451604**

SAB, putative  
 SAB, putative  
 SAB, putative  
 SAB, putative  
 SAB, putative  
 GATA transcription factor, putative

GATA transcription factor, putative  
 UDP-glucosyltransferase, putative  
 UDP-glucosyltransferase, putative  
 Conserved hypothetical protein  
 map3k delta-1 protein kinase, putative  
 Predicted protein  
 Conserved hypothetical protein  
 Protein VERNALIZATION-INSENSITIVE, putative  
 Protein VERNALIZATION-INSENSITIVE, putative  
 Cytochrome P450, putative  
 Cytochrome P450, putative  
 DNA binding protein, putative  
 DNA binding protein, putative  
 Argininosuccinate lyase, putative  
 Argininosuccinate lyase, putative  
**mHbCIRT2085**  
 Conserved hypothetical protein  
 Conserved hypothetical protein  
 Conserved hypothetical protein  
 Conserved hypothetical protein

**Scaffold 114620**

**mHbCIRTAs2698**  
 Mitogen-activated protein kinase kinase kinase

**Scaffold 224948**

Hydrolase, putative  
 Disease resistance protein RPP13, putative  
**mHbCIRT2588**  
 Serine/threonine-protein kinase cx32, putative  
 Dead box ATP-dependent RNA helicase, putative  
 SAUR family protein (SAUR28)

**Scaffold 185123**

**mHbCIRA2715**

**Scaffold 193057**

Pentatricopeptide repeat-containing protein, putative  
 Protein phosphatase methylesterase, putative  
 Protein phosphatase methylesterase, putative  
 Phosphoprotein phosphatase  
 Cytochrome P450, putative  
 Cytochrome P450, putative  
 Tubulin-specific chaperone E, putative  
 Tubulin-specific chaperone E, putative  
 Conserved hypothetical protein

Conserved hypothetical protein  
Conserved hypothetical protein  
Conserved hypothetical protein  
Conserved hypothetical protein

**mHbCIRA2405**

Ubiquitin ligase protein, lrsam1, putative  
Hypothetical protein  
Chlorophyll A/B binding protein, putative

---

**Linkage map-g13**

---

**Scaffold 323928**

Conserved hypothetical protein  
Serine-threonine protein kinase, plant-type, putative  
DNA-binding protein MNB1B, putative  
Hypothetical protein  
DNA-binding protein MNB1B, putative  
Conserved hypothetical protein  
Predicted protein  
DNA repair helicase rad5,16, putative  
Aspartic proteinase nepenthesin-1 precursor, putative  
Aspartic proteinase nepenthesin-1 precursor, putative  
Protein arginine n-methyltransferase, putative  
Protein arginine n-methyltransferase, putative  
Mitochondrial import receptor subunit tom40, putative  
Mitochondrial import receptor subunit tom40, putative  
Reticulocalbin-2 precursor, putative  
**mHbCIRa140**  
Reticulocalbin-2 precursor, putative  
DNA binding protein, putative  
DNA binding protein, putative  
Conserved hypothetical protein  
Conserved hypothetical protein  
Glucose regulated repressor protein, putative  
Protein-s isoprenylcysteine O-methyltransferase, putative  
Conserved hypothetical protein  
Transmembrane protein 53-like  
Glycerol-3-phosphate dehydrogenase, putative  
Cytokinin dehydrogenase, putative  
Cytokinin dehydrogenase, putative  
Silene conica chromosome 76 mitochondrion sequence  
Glycine max protein IQ-DOMAIN 14-like  
N-acetyltransferase, putative  
Conserved hypothetical protein  
Hypothetical protein  
Hypothetical protein  
Nucleotide pyrophosphatase/phosphodiesterase, putative  
Transcription factor, putative

Predicted protein  
Disease resistance response protein, putative  
Conserved hypothetical protein  
Conserved hypothetical protein  
Conserved hypothetical protein  
Conserved hypothetical protein  
Short chain alcohol dehydrogenase, putative  
Predicted protein  
O-methyltransferase, putative  
CC-NBS-LRR resistance protein

#### Scaffold 123832

Conserved hypothetical protein  
Nucleoporin NUP53, putative  
Hypothetical protein  
Conserved hypothetical protein  
Cell division cycle protein 27 homolog B-like  
Predicted protein  
DNA binding protein, putative  
DNA binding protein, putative  
**mHbCIRA2394**  
Conserved hypothetical protein  
Hypothetical protein  
Casein kinase, putative  
Casein kinase, putative  
Conserved hypothetical protein  
Conserved hypothetical protein

#### Scaffold 207081

Katanin p60 ATPase-containing subunit, putative  
**mHbCIRA2415**  
Katanin p60 ATPase-containing subunit, putative

#### Scaffold 411742

**mHbCIRA2523**  
Hypothetical protein

#### Scaffold 411971

Ethylene-insensitive3 protein, putative  
**mHbCIRA2508**  
**hmct21**

#### Scaffold 411167

Phenylalanine ammonia-lyase, putative  
Hypothetical protein  
Carbonic anhydrase, putative  
Conserved hypothetical protein  
**mHbCIRA2757**  
Bell1 homeotic protein, putative  
Conserved hypothetical protein

|                        |                                                                                                                                                                                                                                                                                                                                                                                                                                                                                                                                                                                                                                                                                                                                                                    |
|------------------------|--------------------------------------------------------------------------------------------------------------------------------------------------------------------------------------------------------------------------------------------------------------------------------------------------------------------------------------------------------------------------------------------------------------------------------------------------------------------------------------------------------------------------------------------------------------------------------------------------------------------------------------------------------------------------------------------------------------------------------------------------------------------|
| <b>Scaffold 148311</b> | <b>mHbCIRTAs2456</b>                                                                                                                                                                                                                                                                                                                                                                                                                                                                                                                                                                                                                                                                                                                                               |
|                        | <b>Linkage map-g14</b>                                                                                                                                                                                                                                                                                                                                                                                                                                                                                                                                                                                                                                                                                                                                             |
| <b>Scaffold 416127</b> | Predicted protein<br><b>mHbCIRa282</b>                                                                                                                                                                                                                                                                                                                                                                                                                                                                                                                                                                                                                                                                                                                             |
| <b>Scaffold 501411</b> | <b>mHbCIRA2435</b>                                                                                                                                                                                                                                                                                                                                                                                                                                                                                                                                                                                                                                                                                                                                                 |
| <b>Scaffold 156035</b> | Conserved hypothetical protein<br>Hypothetical protein<br>Protein binding protein, putative<br>Conserved hypothetical protein<br>Glycine-rich RNA-binding protein, putative<br>Hypothetical protein<br>Hypothetical protein<br>Phosphoserine phosphatase, putative<br>ATP synthase f1, gamma subunit, putative<br>Mitochondrial carrier protein, putative<br>Hypothetical protein<br>Histone deacetylase hda1, putative<br><b>mHbCIRA2545</b><br><b>hmct21</b><br>Hypothetical protein<br>Hydrolase, hydrolyzing O-glycosyl compounds, putative                                                                                                                                                                                                                    |
| <b>Scaffold 126947</b> | Alpha-n-acetylglucosaminidase, putative<br>Alpha-n-acetylglucosaminidase, putative<br>Betaine-aldehyde dehydrogenase<br>Betaine-aldehyde dehydrogenase<br>Mannose-1-phosphate guanyltransferase, putative<br>Pentatricopeptide repeat-containing protein, putative<br>Cell division cycle, putative<br>Two-component sensor protein histidine protein kinase, putative<br>Actin binding protein, putative<br>Lipase, putative<br>Conserved hypothetical protein<br>Microtubule-associated protein TORTIFOLIA1, putative<br>Conserved hypothetical protein<br>DNA binding protein, putative<br><i>Hevea brasiliensis</i> isolate SSH16<br>Conserved hypothetical protein<br><b>mHbCIRA2423</b><br>Predicted protein<br>Hypothetical protein<br>Hypothetical protein |

Hypothetical protein  
Predicted protein  
5-formyltetrahydrofolate cyclo-ligase, putative  
5-formyltetrahydrofolate cyclo-ligase, putative  
Rhicadhesin receptor precursor, putative  
DNA binding protein, putative

#### **GTR20**

Conserved hypothetical protein  
R2R3-MYB transcription factor, putative  
Galactosyltransferase, putative  
Predicted protein  
Predicted protein  
ATP binding protein, putative  
ATP binding protein, putative  
ATP binding protein, putative  
tRNA ligase, putative  
tRNA ligase, putative  
tRNA ligase, putative  
HIPL1 protein precursor, putative  
Epstein-Barr nuclear antigen, putative  
Predicted protein  
Conserved hypothetical protein  
Conserved hypothetical protein  
LOB domain-containing protein, putative  
Conserved hypothetical protein

#### **ACR24**

### **Scaffold 409802**

Brassinosteroid insensitive 1-associated receptor kinase 1 precursor  
Protein bem46, putative  
Protein tipD, putative  
Conserved hypothetical protein  
Cysteine protease, putative  
Hypothetical protein  
Predicted protein  
Conserved hypothetical protein  
Predicted protein  
Nucleic acid binding protein, putative  
Nucleic acid binding protein, putative  
Nucleic acid binding protein, putative  
Predicted protein  
Transferase, transferring glycosyl groups, putative  
Transferase, transferring glycosyl groups, putative  
Esterase precursor, putative  
Ubiquitin-protein ligase, putative  
Elongator complex protein, putative  
Predicted protein

Sentrin/sumo-specific protease, putative  
Predicted protein  
Ubiquinone biosynthesis protein coq-8, putative  
Hypothetical protein  
Nucleoside diphosphate kinase, putative  
DELLA protein RGL1, putative  
Anthranilate N-benzoyltransferase protein, putative  
Anthranilate N-benzoyltransferase protein, putative  
Conserved hypothetical protein  
Glyceraldehyde 3-phosphate dehydrogenase, putative  
Conserved hypothetical protein  
Conserved hypothetical protein  
Predicted protein  
Bromodomain-containing protein, putative  
Bromodomain-containing protein, putative  
Predicted protein  
Conserved hypothetical protein  
**mHbCIRA2504**  
AMP dependent CoA ligase, putative

#### Scaffold 120605

**mHbCIRTA2452**  
Conserved hypothetical protein

#### Linkage map-g15

#### Scaffold 169399

Hypothetical protein  
Sodium-bile acid cotransporter, putative  
**mHbCIRa289**  
Bromodomain-containing protein, putative  
**mHbCIRA2391**  
Predicted protein  
Bromodomain-containing protein, putative  
Hypothetical protein  
Transmembrane receptor, putative  
Hypothetical protein  
Hypothetical protein

#### Scaffold 134709

Nucleic acid binding protein, putative  
Nucleic acid binding protein, putative  
Protein kinase APK1B, chloroplast precursor, putative  
Predicted protein  
**mHbCIRT2086**  
Hypothetical protein

#### Scaffold 435366

Conserved hypothetical protein  
Protein binding protein, putative  
Protein binding protein, putative

Protein binding protein, putative  
Serine carboxypeptidase, putative  
**mHbCIRA2483**  
**mHbCIRA2391**  
**mHbCIRA314**  
Sterol regulatory element-binding protein site 2 protease, putative

**Scaffold 129826**

**mHbCIRTAs2709**

**Scaffold 43997**

NAD dehydrogenase, putative  
NAD dehydrogenase, putative  
Conserved hypothetical protein  
Predicted protein  
**mHbCIRA2391**  
Predicted protein  
Dihydrolipoamide acetyltransferase component of pyruvate dehydrogenase, putative  
**mHbCIRA2510**  
Dihydrolipoamide acetyltransferase component of pyruvate dehydrogenase, putative  
MTA/SAH nucleosidase, putative  
**hmct53**  
**Hbtnr-71**  
**mHbCIRt182**  
**gHbCIRA2685**  
3-Phosphoinositide-dependent protein kinase-1, putative  
3-Phosphoinositide-dependent protein kinase-1, putative

**Scaffold 42633**

Conserved hypothetical protein  
Lipid binding protein, putative  
Conserved hypothetical protein  
Predicted protein  
**mHbCIRA2697**  
**mHbCIRa390**  
**hmct21**  
**hmct22**  
Serine-threonine protein kinase, plant-type, putative

**Scaffold 254588**

Hypothetical protein  
Pentatricopeptide repeat-containing protein, putative  
Two-component system sensor histidine kinase/response regulator, putative  
Hypothetical protein  
Leucine-rich repeat-containing protein 2, lrrc2, putative  
Leucine-rich repeat-containing protein 2, lrrc2, putative  
Leucine-rich repeat-containing protein 2, lrrc2, putative  
ATP binding protein, putative  
Conserved hypothetical protein  
Conserved hypothetical protein

Conserved hypothetical protein  
RING-H2 finger protein ATL3C, putative  
Transcription factor RF2b, putative  
Dihydropteroate synthase, putative  
Predicted protein  
Predicted protein  
**mHbCIRA2391**  
Hypothetical protein  
**mHbCIRTA2157**  
**hmct40**  
Hypothetical protein  
Hypothetical protein  
**mHbCIRa095**  
ATP binding protein, putative  
Mn-superoxide dismutase (SODMn) gene  
Conserved hypothetical protein  
Predicted protein  
Aspartic proteinase nepenthesin-1 precursor, putative

#### Scaffold 119584

Dead box ATP-dependent RNA helicase, putative  
Hypothetical protein  
Hypothetical protein  
**mHbCIRA2492**  
Predicted protein  
**mHbCIRA2492**  
**mHbCIRTA2157**

---

#### Linkage map-g16

---

#### Scaffold 154109

Signal recognition particle receptor subunit beta, putative  
**mHbCIRTAs2225**

#### Scaffold 134200

**hmct40**  
Paramyosin, putative  
Cytochrome P450, putative  
Afc, putative  
Pentatricopeptide repeat-containing protein, putative  
Alpha-galactosidase/alpha-n-acetylgalactosaminidase, putative  
**mHbCIRA131**  
Alpha-L-fucosidase 2 precursor, putative  
Alpha-L-fucosidase 2 precursor, putative  
Protein phosphatase 2c, putative  
ATP binding protein, putative  
Conserved hypothetical protein  
Protein phosphatase 2c, putative  
Cytochrome P450, putative

Serine/threonine-protein kinase bri1, putative  
ATP binding protein, putative  
Suppressor of ty, putative  
Predicted protein  
Cysteine desulfuration protein sufe, putative  
Cytochrome P450, putative  
Hypothetical protein

**Scaffold 251160**

Axial regulator YABBY4, putative  
**mHbCIRA2407**

**Scaffold 177599**

Hypothetical protein  
Heat shock protein 70 (HSP70)-interacting protein, putative  
Predicted protein  
Alcohol dehydrogenase, putative  
**mHbCIRA097**  
Nucleotide binding protein, putative  
Predicted protein

**Scaffold 158956**

**mHbCIRA2765**  
Ribonuclease z, chloroplast, putative  
Ribonuclease z, chloroplast, putative

**Scaffold 307979**

**Hbtnr-17**  
**mHbCIRA275**  
Beta-1,3-galactosyltransferase sqv-2, putative

**Scaffold 420218**

MADs box protein, putative  
**mHbCIRA2396**

**Scaffold 234640**

**mHbCIRA179**

**Linkage map-g17**

**Scaffold 121986**

**mHbCIRTs2188**

**Scaffold 413909**

**gHbCIRTAs2720**  
Conserved hypothetical protein  
Conserved hypothetical protein  
Conserved hypothetical protein  
Glucan endo-1,3-beta-glucosidase precursor, putative  
**mHbCIRA2414**  
Hypothetical protein  
Conserved hypothetical protein  
Conserved hypothetical protein  
DUF26 domain-containing protein 1 precursor, putative  
Conserved hypothetical protein

Nucleic acid binding protein, putative  
Nucleic acid binding protein, putative  
Calcium ion binding protein, putative  
Ubiquitin-conjugating enzyme, putative

**hmac2**

**hmct21**

**gHbCIRA2511**

#### Scaffold 418287

**hmct12**

**mHbCIRA2425**

Beta-ketoacyl-ACP synthase I

**mHbCIRa344**

**mHbCIRa78**

Conserved hypothetical protein

Urease accessory protein ureG, putative

DNA replication licensing factor MCM3, putative

Beta-ketoacyl-ACP synthase I

#### Scaffold 433878

Pectinesterase (MTR\_3g010770)

Coatomer gamma subunit, putative

**mHbCIRT140**

Guanine nucleotide-binding protein beta, putative

Glucan endo-1,3-beta-glucosidase precursor, putative

**mHbCIRA2418-2**

Adenylyl cyclase-associated protein, putative

Cytochrome P450 3A27 putative

Serine/threonine-protein kinase PBS1, putative

Hypothetical protein

Predicted protein

2-Hydroxyacid dehydrogenase, putative

Conserved hypothetical protein

Predicted protein

NADH-ubiquinone oxidoreductase 1, chain, putative

Phenylalanyl-trna synthetase beta chain, putative

Phenylalanyl-trna synthetase beta chain, putative

Conserved hypothetical protein

Irr receptor protein kinase, putative

Hypothetical protein

DNA binding protein, putative

Hypothetical protein

Hypothetical protein

Predicted protein

Predicted protein

Acyltransferase, putative

Hypothetical protein

**Scaffold 133200****mHbCIRT2447****Scaffold 521115****mHbCIRA2391**

Oligopeptide transporter, putative

Cadmium-induced protein AS8, putative

**mHbCIRA2387**

Predicted protein

**mHbCIRTA2157****hmac3****Linkage map-g18****Scaffold 122775**

Multidrug resistance protein ABC transporter family

Multidrug resistance protein ABC transporter family

Mitochondrial translational initiation factor, putative

Ubiquitin ligase protein cop1, putative

Ubiquitin ligase protein cop1, putative

Predicted protein

Predicted protein

Hypothetical protein

Ubiquitin-conjugating enzyme E2, putative

Predicted protein

Aldose 1-epimerase, putative

Beta-1,3-galactosyltransferase sqv-2, putative

50S ribosomal protein L18, chloroplast precursor, putative

**mHbCIRT2113**

Predicted protein

**Scaffold 174767****mHbCIRA2197****Scaffold 108198**

Glutathione s-transferase, putative

Conserved hypothetical protein

Conserved hypothetical protein

Conserved hypothetical protein

Conserved hypothetical protein

DNA binding protein, putative

UTP-glucose-1-phosphate uridylyltransferase, putative

UTP-glucose-1-phosphate uridylyltransferase, putative

NADP-specific isocitrate dehydrogenase, putative

Glutamate decarboxylase, putative

Conserved hypothetical protein

nnp-1 protein, putative

Predicted protein

Conserved hypothetical protein

Conserved hypothetical protein

Conserved hypothetical protein  
Transcription factor, putative  
Predicted protein  
Nonsense-mediated decay protein, putative

**mHbCIRA2422**

Importin beta-3, putative  
Oxidoreductase, putative  
Conserved hypothetical protein  
Zinc finger protein, putative  
Receptor protein kinase, putative

**Scaffold 155107**

Amine oxidase, putative  
O-linked n-acetylglucosamine transferase, ogt, putative  
O-linked n-acetylglucosamine transferase, ogt, putative  
N-acetylglucosamine kinase, putative  
N-acetylglucosamine kinase, putative

**mHbCIRA463**

Conserved hypothetical protein  
Serine/threonine-protein kinase PBS1, putative  
Serine/threonine-protein kinase PBS1, putative  
Small nucleolar RNA-associated protein 14 homolog A-like  
protein kinase, putative  
F-box/leucine rich repeat protein, putative  
F-box/leucine rich repeat protein, putative  
Transcription initiation factor TFIID subunit  
Conserved hypothetical protein  
Hypothetical protein  
Phosphoenolpyruvate carboxylase

**Scaffold 181819**

**mHbCIRA320**

**Scaffold 436803**

Protein with unknown function  
Transcription factor, putative  
Serine/threonine-protein kinase cx32, putative  
Serine/threonine-protein kinase cx32, putative  
Dihydrodipicolinate synthase, putative  
Nucellin, putative  
Disease resistance response protein, putative  
Suppressor of actin, putative

**mHbCIRA2482**

Catalase (cat)  
Hypothetical protein  
Plant ubiquilin, putative

**SSR P2-D6-2**

Cyclin B, putative  
Predicted protein

GTP binding protein, putative  
GTP binding protein, putative  
Predicted protein  
Hypothetical protein  
Isocitrate dehydrogenase, putative

**Scaffold 155502**

Hypothetical protein  
**mHbCIRA2409**

**Scaffold 577425**

Sodium-dependent phosphate transport protein, putative  
**mHbCIRTAs2217**  
Cytochrome P450, putative  
Conserved hypothetical protein  
Predicted protein  
Josephin-2, putative  
Predicted protein  
Catalytic, putative  
Catalytic, putative  
Predicted protein  
Conserved hypothetical protein  
Conserved hypothetical protein  
Sugar transporter, putative  
Predicted protein  
Predicted protein  
DNA binding protein, putative  
phosphatidylinositol n-acetylglucosaminyltransferase subunit p, putative  
conserved hypothetical protein  
**mHbCIRA2391**

**Scaffold 410482**

**mHbCIRT373**  
Hypothetical protein  
**mHbCIRT2391**  
Serine-threonine protein kinase, plant-type, putative  
Serine-threonine protein kinase, plant-type, putative  
Serine-threonine protein kinase, plant-type, putative  
ATP binding protein, putative

**Scaffold 513701**

DNA mismatch repair protein mlh1, putative  
DNA mismatch repair protein mlh1, putative  
DNA mismatch repair protein mlh1, putative  
Dead box ATP-dependent RNA helicase, putative  
**ACR37**  
**mHbCIRT1067**  
Hydrolase, putative  
Hypothetical protein  
Prefoldin-related ke2-like protein

**Scaffold 128818**

Conserved hypothetical protein  
**mHbCIRA2439**  
Conserved hypothetical protein  
Conserved hypothetical protein  
Conserved hypothetical protein  
Serine-threonine protein kinase, plant-type, putative

**Scaffold 467142**

**mHbCIRTAs 2744**  
Aspartate kinase, putative

**Scaffold 336055**

**mHbCIRA288**

**Scaffold 308928**

**mHbCIRTAs 2271**  
Sterol desaturase, putative

---

**Table S3.** Main classes of repeat elements in the *H. brasiliensis* genome assembly

| <b>Class</b>            | <b>Types</b>     | <b>Total repeats (%)</b> |
|-------------------------|------------------|--------------------------|
| <b>DNA transposons</b>  | En-Spm           | 0.61                     |
|                         | MuDR             | 0.45                     |
|                         | hAT-Tag1         | 0.21                     |
|                         | hAT-Ac           | 0.14                     |
|                         | hAT-Tip100       | 0.09                     |
|                         | Helitron         | 0.01                     |
|                         | Others           | 0.05                     |
| <b>Retrotransposons</b> | LTR/Gypsy        | 38.20                    |
|                         | LTR/Copia        | 7.38                     |
|                         | LTR/Caulimovirus | 0.39                     |
|                         | LINE/ RTE-BovB   | 0.97                     |
|                         | LINE/ L1         | 0.34                     |
|                         | LINE/CR1         | 0.05                     |
|                         | LINE/ R1         | 0.02                     |
|                         | SINE             | 0.01                     |
|                         | Others           | 0.18                     |
| <b>Satellite</b>        |                  | 0.02                     |
| <b>Simple repeat</b>    |                  | 0.64                     |
| <b>Unknown</b>          |                  | 50.24                    |

**Table S4.** Summary statistics of gene models predicted by seven programs

|                         | <b>EVM</b> | <b>AUGUSTUS</b> | <b>FGENESH</b> | <b>GENEID</b> | <b>GENEMARK<br/>HMME</b> | <b>GLIMMER<br/>HMM</b> | <b>SNAP</b> |
|-------------------------|------------|-----------------|----------------|---------------|--------------------------|------------------------|-------------|
| Number of models        | 68,955     | 48,087          | 62,020         | 65,851        | 65,669                   | 65,902                 | 59,591      |
| Total number of bases   | 47,978,108 | 41,396,159      | 47,897,431     | 39,074,868    | 44,307,210               | 30,116,191             | 41,503,482  |
| Average ORF length (bp) | 696        | 861             | 772            | 593           | 675                      | 457                    | 696         |

**Table S5.** Comparison of publicly available *H. brasiliensis* transcripts with the genome

| Resource                         | Accession No.         | <i>Hevea</i> clone          | No. Sequences  | No. Aligned <sup>a</sup> | % Aligned    |
|----------------------------------|-----------------------|-----------------------------|----------------|--------------------------|--------------|
| NCBI dbEST <sup>b</sup>          | Various               | Primarily (>90%)<br>RRIM600 | 37,826         | 36,786                   | 97.25        |
| BIOTEC,<br>Thailand <sup>c</sup> | N/A                   | RRIM600                     | 28,300         | 28,237                   | 99.78        |
| NCBI GEO <sup>d</sup>            | GSE26514              | RY7-33-97                   | 48,768         | 45,640                   | 93.59        |
| NCBI TSA <sup>e</sup>            | JR344291-<br>JR366936 | RY7-33-97                   | 22,646         | 20,589                   | 90.92        |
| <b>Total</b>                     |                       |                             | <b>137,540</b> | <b>131,252</b>           | <b>95.43</b> |

<sup>a</sup>BLAST hits with E-value < 10<sup>-5</sup> and 90% sequence identity cutoff

<sup>b</sup>Data available as of October 2012

<sup>c</sup>Isotig sequences from <http://www4a.biotec.or.th/rubber/Download> (ref. 6)

<sup>d</sup>Unigenes from ref. 7

<sup>e</sup>Assembled transcripts from ref. 10

**Table S6.** General features of the transcriptome assembly

|                                                                  |        |
|------------------------------------------------------------------|--------|
| Number of contigs                                                | 73,060 |
| Mean length of contigs (bp)                                      | 1,173  |
| Length of the largest contig (bp)                                | 15,597 |
| Number of contigs aligned to the genome (>90% sequence identity) | 72,644 |
| Number of contigs with NR alignment                              | 55,154 |
| Number of unique GI accession IDs                                | 19,788 |
| Number of contigs with matching protein coverage of 80-100%      | 18,571 |
| Number of unique GIs with matching protein coverage of 80-100%   | 10,161 |
| Number of contigs with matching protein coverage of 50-80%       | 13,198 |
| Number of unique GIs with matching protein coverage of 50-80%    | 6,593  |

**Table S7.** Functional annotation of predicted proteins for *H. brasiliensis*

| Protein databases  | Number of proteins |
|--------------------|--------------------|
| NR alignment       | 52,968             |
| KEGG alignment     | 52,825             |
| KOG/COG assignment | 33,472             |
| EC assignment      | 16,779             |
| KO assignment      | 28,488             |
| GO assignment      | 26,816             |
| InterPro signature | 41,743             |

**Table S8.** Comparison of KOG functions across various sequenced plant genomes

| <b>KOG Functions</b>                                              | <i>Hevea<br/>brasiliensis</i> | <i>Ricinus<br/>communis</i> | <i>Populus<br/>trichocarpa</i> | <i>Arabidopsis<br/>thaliana</i> | <i>Eucalyptus<br/>grandis</i> | <i>Oryza<br/>sativa</i> | <i>Zea<br/>mays</i> |
|-------------------------------------------------------------------|-------------------------------|-----------------------------|--------------------------------|---------------------------------|-------------------------------|-------------------------|---------------------|
| <b>INFORMATION STORAGE AND PROCESSING</b>                         |                               |                             |                                |                                 |                               |                         |                     |
| [J] Translation, ribosomal structure and biogenesis               | 1236                          | 663                         | 1129                           | 1068                            | 1207                          | 1109                    | 2290                |
| [A] RNA processing and modification                               | 1067                          | 547                         | 999                            | 940                             | 1023                          | 976                     | 1814                |
| [K] Transcription                                                 | 1459                          | 826                         | 1619                           | 1618                            | 1608                          | 1508                    | 2419                |
| [L] Replication, recombination and repair                         | 661                           | 314                         | 654                            | 504                             | 595                           | 486                     | 853                 |
| [B] Chromatin structure and dynamics                              | 377                           | 183                         | 348                            | 349                             | 323                           | 284                     | 578                 |
| <b>CELLULAR PROCESSES AND SIGNALING</b>                           |                               |                             |                                |                                 |                               |                         |                     |
| [D] Cell cycle control, cell division, chromosome partitioning    | 627                           | 300                         | 537                            | 565                             | 593                           | 495                     | 969                 |
| [Y] Nuclear structure                                             | 122                           | 40                          | 80                             | 72                              | 60                            | 62                      | 128                 |
| [V] Defense mechanisms                                            | 274                           | 136                         | 261                            | 180                             | 334                           | 280                     | 370                 |
| [T] Signal transduction mechanisms                                | 5216                          | 1959                        | 4288                           | 2837                            | 6806                          | 4006                    | 4857                |
| [M] Cell wall/membrane/envelope biogenesis                        | 464                           | 202                         | 366                            | 288                             | 478                           | 365                     | 589                 |
| [N] Cell motility                                                 | 7                             | 2                           | 3                              | 5                               | 4                             | 6                       | 2                   |
| [Z] Cytoskeleton                                                  | 1092                          | 404                         | 826                            | 701                             | 1046                          | 697                     | 1333                |
| [W] Extracellular structures                                      | 116                           | 55                          | 115                            | 66                              | 81                            | 73                      | 91                  |
| [U] Intracellular trafficking, secretion, and vesicular transport | 1496                          | 638                         | 1276                           | 1142                            | 1367                          | 1188                    | 2210                |
| [O] Posttranslational modification, protein turnover, chaperones  | 2886                          | 1486                        | 2691                           | 2396                            | 3227                          | 2726                    | 4451                |
| <b>METABOLISM</b>                                                 |                               |                             |                                |                                 |                               |                         |                     |
| [C] Energy production and conversion                              | 1119                          | 657                         | 973                            | 749                             | 1555                          | 982                     | 1585                |
| [G] Carbohydrate transport and metabolism                         | 1665                          | 804                         | 1354                           | 1102                            | 1817                          | 1336                    | 1993                |
| [E] Amino acid transport and metabolism                           | 1119                          | 613                         | 962                            | 809                             | 1266                          | 1011                    | 1565                |
| [F] Nucleotide transport and metabolism                           | 299                           | 157                         | 232                            | 215                             | 243                           | 281                     | 475                 |
| [H] Coenzyme transport and metabolism                             | 289                           | 159                         | 239                            | 212                             | 292                           | 235                     | 393                 |
| [I] Lipid transport and metabolism                                | 1178                          | 638                         | 1038                           | 832                             | 1478                          | 963                     | 1635                |
| [P] Inorganic ion transport and metabolism                        | 902                           | 433                         | 848                            | 590                             | 963                           | 673                     | 1045                |
| [Q] Secondary metabolites biosynthesis, transport and catabolism  | 1470                          | 768                         | 1171                           | 785                             | 2007                          | 1018                    | 1289                |
| <b>POORLY CHARACTERIZED</b>                                       |                               |                             |                                |                                 |                               |                         |                     |
| [R] General function prediction only                              | 3493                          | 1834                        | 3085                           | 2790                            | 4156                          | 3023                    | 4499                |
| [S] Function unknown                                              | 1449                          | 723                         | 1388                           | 1163                            | 1675                          | 1282                    | 2240                |

**Table S9.** Pfam domains in the *H. brasiliensis* genome. Only the most abundant domains ( $\geq 10$  hits) are listed.

| <b>Pfam Domain</b>                                                  | <b>Hits</b> |
|---------------------------------------------------------------------|-------------|
| Leucine Rich Repeat                                                 | 7259        |
| Ankyrin repeat                                                      | 1030        |
| EF hand                                                             | 657         |
| GTPase of unknown function                                          | 534         |
| ABC transporter                                                     | 518         |
| ATPase family associated with various cellular activities (AAA)     | 433         |
| Binding-protein-dependent transport system inner membrane component | 348         |
| ATP synthase A chain                                                | 319         |
| Cytochrome P450                                                     | 292         |
| 7 transmembrane receptor (rhodopsin family)                         | 290         |
| Cytochrome C and Quinol oxidase polypeptide I                       | 283         |
| DEAD/DEAH box helicase                                              | 211         |
| Elongation factor Tu GTP binding domain                             | 188         |
| Helicase conserved C-terminal domain                                | 147         |
| Homeobox domain                                                     | 134         |
| FAD dependent oxidoreductase                                        | 129         |
| alpha/beta hydrolase fold                                           | 128         |
| haloacid dehalogenase-like hydrolase                                | 114         |
| Elongation factor Tu domain 2                                       | 103         |
| Glycosyl transferases group 1                                       | 93          |
| CBS domain pair                                                     | 82          |
| His Kinase A (phosphoacceptor) domain                               | 80          |
| 4Fe-4S binding domain                                               | 78          |
| Aminotransferase class I and II                                     | 78          |
| Calcineurin-like phosphoesterase                                    | 74          |
| ATP synthase alpha/beta family, nucleotide-binding domain           | 69          |
| Alcohol dehydrogenase GroES-like domain                             | 63          |
| Histidine kinase-, DNA gyrase B-, and HSP90-like ATPase             | 55          |
| Acetyltransferase (GNAT) family                                     | 52          |
| AMP-binding enzyme                                                  | 52          |
| Cytochrome b(C-terminal)/b6/petD                                    | 52          |
| 4Fe-4S iron sulfur cluster binding proteins, NifH/frxC family       | 41          |
| Aldehyde dehydrogenase family                                       | 41          |
| Glycosyl transferase family 2                                       | 39          |
| Cytochrome b(N-terminal)/b6/petB                                    | 32          |
| Cytochrome C oxidase subunit II, transmembrane domain               | 32          |
| HAMP domain                                                         | 30          |
| Elongation factor Tu C-terminal domain                              | 27          |
| Bacterial regulatory helix-turn-helix protein, lysR family          | 24          |
| ATP synthase alpha/beta family, beta-barrel domain                  | 23          |
| Bacterial regulatory helix-turn-helix proteins, AraC family         | 21          |
| Bacterial regulatory proteins, gntR family                          | 18          |
| gag gene protein p24 (core nucleocapsid protein)                    | 18          |
| Helix-turn-helix                                                    | 18          |
| Bacterial regulatory proteins, tetR family                          | 15          |
| gag gene protein p17 (matrix protein)                               | 15          |

**Table S10.** Predicted subcellular localization of *H. brasiliensis* gene models based on SignalP 3.0 analysis

| <b>Localization Site</b> | <b>Hits</b> | <b>GO Cellular Component ID</b> |
|--------------------------|-------------|---------------------------------|
| Chloroplast              | 1699        | 0005576, 0009543, 0009507       |
| Extracellular            | 1367        | 0005618                         |
| Plasma Membrane          | 554         | 0005886                         |
| Vacuolar Membrane        | 368         | 0005774(2)                      |
| Cytosol                  | 286         | 0005829                         |
| Nuclear                  | 249         | 0005634                         |
| Endoplasmic Reticulum    | 56          | 0005783                         |
| Mitochondria             | 47          | 0005739                         |
| Golgi Apparatus          | 12          | 0005794(1)                      |
| Peroxisome               | 5           | 0005777(2)                      |
| <b>Total</b>             | <b>4643</b> |                                 |

**Table S11.** tRNA types found in the *H. brasiliensis* genome

| <b>tRNA type</b> | <b>Number</b> | <b>Number of Introns</b> |
|------------------|---------------|--------------------------|
| Ala              | 37            | 1                        |
| Arg              | 50            |                          |
| Asn              | 24            |                          |
| Asp              | 29            |                          |
| Cys              | 17            |                          |
| Gln              | 19            |                          |
| Glu              | 33            |                          |
| Gly              | 58            |                          |
| His              | 16            |                          |
| Ile              | 33            |                          |
| Leu              | 59            | 1                        |
| Lys              | 40            |                          |
| Met              | 47            | 11                       |
| Phe              | 27            |                          |
| Pro              | 14            |                          |
| Ser              | 62            |                          |
| Thr              | 42            |                          |
| Trp              | 13            |                          |
| Tyr              | 21            | 17                       |
| Val              | 40            |                          |
| Pseudo           | 32            | 3                        |
| Sup              | 12            |                          |
| Undet            | 4             |                          |
| <b>Total</b>     | <b>729</b>    | <b>33</b>                |

**Table S12.** Gene Ontology (GO) analysis of *Hevea* specific genes. Only the most abundant GO terms ( $\geq 10$  hits) are listed.

| GO terms   | Hits | Description                                       |
|------------|------|---------------------------------------------------|
| GO:0005524 | 746  | ATP binding                                       |
| GO:0000166 | 409  | Nucleotide binding                                |
| GO:0004672 | 374  | Protein kinase activity                           |
| GO:0006468 | 374  | Protein phosphorylation                           |
| GO:0006915 | 335  | Apoptosis                                         |
| GO:0006952 | 325  | Defense response                                  |
| GO:0004674 | 294  | Protein serine/threonine kinase activity          |
| GO:0003676 | 278  | Nucleic acid binding                              |
| GO:0016301 | 232  | Kinase activity                                   |
| GO:0016740 | 225  | Transferase activity                              |
| GO:0003677 | 204  | DNA binding                                       |
| GO:0016491 | 198  | Oxidoreductase activity                           |
| GO:0008270 | 189  | Zinc ion binding                                  |
| GO:0055114 | 189  | Oxidation-reduction process                       |
| GO:0016020 | 185  | Membrane                                          |
| GO:0016787 | 171  | Hydrolase activity                                |
| GO:0016021 | 150  | Integral to membrane                              |
| GO:0008152 | 130  | Metabolic process                                 |
| GO:0007165 | 122  | Signal transduction                               |
| GO:0004888 | 111  | Transmembrane signaling receptor activity         |
| GO:0031224 | 111  | Intrinsic to membrane                             |
| GO:0045087 | 111  | Innate immune response                            |
| GO:0032440 | 107  | 2-alkenal reductase[NAD(p)] activity              |
| GO:0017111 | 103  | Nucleoside-triphosphatase activity                |
| GO:0003824 | 101  | Catalytic activity                                |
| GO:0015074 | 101  | DNA integration                                   |
| GO:0004721 | 92   | Phosphoprotein phosphatase activity               |
| GO:0004872 | 86   | Receptor activity                                 |
| GO:0005488 | 85   | Binding                                           |
| GO:0003723 | 79   | RNA binding                                       |
| GO:0005634 | 76   | Nucleus                                           |
| GO:0003964 | 74   | RNA-directed DNA polymerase activity              |
| GO:0006278 | 63   | RNA-dependent DNA replication                     |
| GO:0005529 | 51   | Sugar binding                                     |
| GO:0045449 | 49   | Regulation of transcription, DNA-dependent        |
| GO:0004715 | 48   | Non-membrane spanning protein tyrosine kinase     |
| GO:0046872 | 48   | Metal ion binding                                 |
| GO:0006508 | 47   | Proteolysis                                       |
| GO:0005975 | 44   | Carbohydrate metabolic process                    |
| GO:0006355 | 37   | Regulation of transcription, DNA-dependent        |
| GO:0004713 | 36   | Protein tyrosine kinase activity                  |
| GO:0016310 | 36   | Phosphorylation                                   |
| GO:0004553 | 35   | Hydrolase activity, hydrolyzing O-glycosyl        |
| GO:0004523 | 34   | Ribonuclease H activity                           |
| GO:0005506 | 34   | Iron ion binding                                  |
| GO:0004709 | 33   | MAP kinase kinase kinase activity                 |
| GO:0005622 | 33   | Intracellular                                     |
| GO:0048544 | 33   | Recognition of pollen                             |
| GO:0004497 | 30   | Monooxygenase activity                            |
| GO:0020037 | 29   | Heme binding                                      |
| GO:0005509 | 27   | Calcium ion binding                               |
| GO:0009055 | 27   | Electron carrier activity                         |
| GO:0043169 | 26   | Cation binding                                    |
| GO:0006350 | 25   | Transcription, DNA-dependent                      |
| GO:0016758 | 25   | Transferase activity, transferring hexosyl groups |
| GO:0016798 | 25   | Hydrolase activity, acting on glycosyl bonds      |

|            |    |                                                             |
|------------|----|-------------------------------------------------------------|
| GO:0046983 | 23 | Protein dimerization activity                               |
| GO:0016829 | 22 | Lyase activity                                              |
| GO:0016757 | 21 | Transferase activity, transferring glycosyl groups          |
| GO:0005737 | 20 | Cytoplasm                                                   |
| GO:0055085 | 20 | Transmembrane transport                                     |
| GO:0000287 | 19 | Magnesium ion binding                                       |
| GO:0000785 | 19 | Chromatin                                                   |
| GO:0003682 | 19 | Chromatin binding                                           |
| GO:0004190 | 19 | Aspartic-type endopeptidase activity                        |
| GO:0006333 | 19 | Chromatin assembly or disassembly                           |
| GO:0004697 | 18 | Protein kinase C activity                                   |
| GO:0008233 | 16 | Peptidase activity                                          |
| GO:0006351 | 14 | Transcription, DNA-dependent                                |
| GO:0008353 | 14 | RNA polymerase II carboxy-terminal domain kinase activity   |
| GO:0000160 | 13 | Two-component signal transduction system (phosphorelay)     |
| GO:0047213 | 13 | Anthocyanidin 3-O-glucosyltransferase activity              |
| GO:0004714 | 12 | Transmembrane receptor protein tyrosine kinase activity     |
| GO:0005525 | 12 | GTP binding                                                 |
| GO:0008236 | 12 | Serine-type peptidase activity                              |
| GO:0003700 | 11 | Sequence-specific DNA binding transcription factor activity |
| GO:0004252 | 11 | Serine-type endopeptidase activity                          |
| GO:0004568 | 11 | Chitinase activity                                          |
| GO:0006032 | 11 | Chitin catabolic process                                    |
| GO:0016998 | 11 | Cell wall macromolecule catabolic process                   |
| GO:0050660 | 11 | Flavin adenine dinucleotide binding                         |
| GO:0006810 | 10 | Transport                                                   |
| GO:0008168 | 10 | Methyltransferase activity                                  |
| GO:0032259 | 10 | Methylation                                                 |
| GO:0044237 | 10 | Cellular metabolic process                                  |
| GO:0050662 | 10 | Coenzyme binding                                            |

---

**Table S13.** InterPro domains within the *Hevea* specific lineage. Only the most abundant domains ( $\geq 10$  hits) are listed.

| <b>InterPro ID</b> | <b>Hits</b> | <b>Domain Description</b>                         |
|--------------------|-------------|---------------------------------------------------|
| IPR001611          | 846         | Leucine-rich repeat                               |
| IPR017442          | 178         | Serine/threonine-protein kinase-like domain       |
| IPR002885          | 124         | Pentatricopeptide repeat                          |
| IPR001245          | 110         | Serine-threonine/tyrosine-protein kinase          |
| IPR002182          | 110         | NB-ARC                                            |
| IPR013210          | 86          | Leucine-rich repeat-containing N-terminal, type 2 |
| IPR002110          | 54          | Ankyrin repeat                                    |
| IPR000157          | 49          | Toll-Interleukin receptor                         |
| IPR005162          | 49          | Retrotransposon gag protein                       |
| IPR001128          | 35          | Cytochrome P450                                   |
| IPR004158          | 30          | Protein of unknown function DUF247, plant         |
| IPR001480          | 24          | Bulb-type lectin domain                           |
| IPR013242          | 23          | Retroviral aspartyl protease                      |
| IPR005508          | 22          | Protein of unknown function DUF313                |
| IPR002902          | 20          | Gnk2-homologous domain                            |
| IPR003340          | 20          | Transcriptional factor B3                         |
| IPR004252          | 18          | Transposase, PttA/En/Spm, plant                   |
| IPR003656          | 17          | Zinc finger, BED-type predicted                   |
| IPR000626          | 16          | Ubiquitin                                         |
| IPR021820          | 16          | S-locus receptor kinase, C-terminal               |
| IPR001810          | 15          | F-box domain, cyclin-like                         |
| IPR002213          | 15          | UDP-glucuronosyl/UDP-glucosyltransferase          |
| IPR000858          | 13          | S-locus glycoprotein                              |
| IPR000504          | 12          | RNA recognition motif domain                      |
| IPR001878          | 12          | Zinc finger, CCHC-type                            |
| IPR003676          | 12          | Auxin responsive SAUR protein                     |
| IPR005630          | 12          | Terpene synthase, metal-binding domain            |
| IPR013695          | 12          | Wall-associated kinase                            |
| IPR001153          | 11          | Barwin                                            |
| IPR005123          | 11          | Oxoglutarate/iron-dependent oxygenase             |
| IPR023210          | 11          | NADP-dependent oxidoreductase domain              |
| IPR001360          | 10          | Glycoside hydrolase, family 1                     |
| IPR011713          | 10          | Leucine-rich repeat 3                             |

**Table S14.** Pfam domains within the *Hevea* specific lineage. Only the most abundant domains ( $\geq 10$  hits) are listed.

| <b>Pfam ID</b> | <b>Hits</b> | <b>Domain Description</b>                     |
|----------------|-------------|-----------------------------------------------|
| PF00560        | 846         | LRR_1                                         |
| PF00069        | 178         | Pkinase                                       |
| PF01535        | 124         | PR                                            |
| PF00931        | 110         | NB-ARC                                        |
| PF07714        | 110         | Pkinase_Tyr                                   |
| PF08263        | 86          | LRRNT_2                                       |
| PF00023        | 54          | Ank                                           |
| PF01582        | 49          | TIR                                           |
| PF03732        | 49          | Retrotrans_gag                                |
| PF00067        | 35          | p450                                          |
| PF03140        | 30          | Domain of unknown function                    |
| PF01453        | 24          | D-mannose binding lectin                      |
| PF08284        | 23          | Retroviral aspartyl protease                  |
| PF03754        | 22          | Domain of unknown function (DUF313)           |
| PF01657        | 20          | Domain of unknown function                    |
| PF02362        | 20          | B3 domain                                     |
| PF03004        | 18          | Plant transposase (Pta/En/Spm family)         |
| PF02892        | 17          | ED zinc finger                                |
| PF00240        | 16          | Ubiquitin                                     |
| PF11883        | 16          | Domain of unknown function                    |
| PF00201        | 15          | Glucuronosyltransferase                       |
| PF00646        | 15          | F-box protein                                 |
| PF00954        | 13          | S-locus glycoprotein family                   |
| PF00076        | 12          | RNA recognition motif                         |
| PF00098        | 12          | Zinc finger                                   |
| PF02519        | 12          | Auxin responsive protein                      |
| PF03936        | 12          | Terpene synthase family, metal binding domain |
| PF08488        | 12          | Wall-associated kinase                        |
| PF00248        | 11          | Aldo-keto reductase                           |
| PF00967        | 11          | Barwin domain                                 |
| PF03171        | 11          | 2OG-Fe(II) oxygenase superfamily              |
| PF00232        | 10          | Glycoside hydrolase family 1                  |
| PF07725        | 10          | Leucine Rich Repeat                           |

**Table S15.** KOG analysis of *Hevea* specific genes

| <b>KOG Functions</b>                                              | <b>Counts</b> |
|-------------------------------------------------------------------|---------------|
| <i>Information and Storage and Processing</i>                     |               |
| [J] Translation, ribosomal structure and biogenesis               | 27            |
| [A] RNA processing and modification                               | 18            |
| [K] Transcription                                                 | 21            |
| [L] Replication, recombination and repair                         | 30            |
| [B] Chromatin structure and dynamics                              | 10            |
| <i>Cellular Processes and Signaling</i>                           |               |
| [D] Cell cycle control, cell division, chromosome partitioning    | 17            |
| [Y] Nuclear structure                                             | 2             |
| [V] Defense mechanisms                                            | 16            |
| [T] Signal transduction mechanisms                                | 603           |
| [M] Cell wall/membrane/envelope biogenesis                        | 29            |
| [N] Cell motility                                                 | 0             |
| [Z] Cytoskeleton                                                  | 116           |
| [W] Extracellular structures                                      | 11            |
| [U] Intracellular trafficking, secretion, and vesicular transport | 13            |
| [O] Posttranslational modification, protein turnover, chaperones  | 89            |
| <i>Metabolism</i>                                                 |               |
| [C] Energy production and conversion                              | 48            |
| [G] Carbohydrate transport and metabolism                         | 74            |
| [E] Amino acid transport and metabolism                           | 38            |
| [F] Nucleotide transport and metabolism                           | 2             |
| [H] Coenzyme transport and metabolism                             | 12            |
| [I] Lipid transport and metabolism                                | 32            |
| [P] Inorganic ion transport and metabolism                        | 22            |
| [Q] Secondary metabolites biosynthesis, transport and catabolism  | 80            |
| <i>Poorly Characterized</i>                                       |               |
| [R] General function prediction only                              | 140           |
| [S] Function unknown                                              | 67            |

**Table S16.** Rubber biosynthesis related genes in the *H. brasiliensis* genome. Shading indicates the transcript has been validated from leaf and/or latex cDNA pools.

| Gene model                         | Gene name                                                   | EC No.    | Members |
|------------------------------------|-------------------------------------------------------------|-----------|---------|
| HBM_contig317144_s139324c15_gene2  | 1,4-alpha-glucan branching enzyme                           | 2.4.1.18  | 1       |
| HBM_contig1307528_s417190c7_gene1  | 1-deoxy-D-xylulose-5-phosphate isomeroreductase             | 1.1.1.267 | 2       |
| HBM_contig343183_s151438c5_gene1   |                                                             |           |         |
| HBM_contig1288739_s409811c4_gene1  | 1-deoxyxylulose-5-phosphate synthase                        | 2.2.1.7   | 7       |
| HBM_contig529416_s246980c14_gene1  |                                                             |           |         |
| HBM_contig199115_s88445_gene1      |                                                             |           |         |
| HBM_contig366145_s162700_gene1     |                                                             |           |         |
| HBM_contig979245_s352662c2_gene3   |                                                             |           |         |
| HBM_contig1343951_s444526c6_gene1  |                                                             |           |         |
| HBM_contig1404580_s501548c30_gene1 |                                                             |           |         |
| HBM_contig1289901_s410013c1_gene1  | 2,1-fructan:2,1-fructan 1-fructosyltransferase/levansucrase | 2.4.1.10  | 2       |
| HBM_contig1297666_s412376_gene1    |                                                             |           |         |
| HBM_contig1326688_s430296c2_gene2  | 2-C-methyl-D-erythritol 2,4-cyclodiphosphate synthase       | 4.6.1.12  | 2       |
| HBM_contig217879_s96943c3_gene1    |                                                             |           |         |
| HBM_contig1339539_s440773c5_gene3  | 2-C-methyl-D-erythritol 4-phosphate cytidyltransferase      | 2.7.7.60  | 2       |
| HBM_contig229209_s101968_gene1     |                                                             |           |         |
| HBM_contig382299_s170997c9_gene2   | 2-oxoglutaratedehydrogenase                                 | 1.2.4.2   | 1       |
| HBM_contig395100_s177727c26_gene1  | 4-alpha-glucanotransferase                                  | 2.4.1.25  | 1       |
| HBM_contig1308223_s417615c21_gene1 | 4-diphosphocytidyl-2-C-methyl-d-erythritol kinase           | 2.7.1.148 | 2       |
| HBM_contig302280_s132669c17_gene1  |                                                             |           |         |
| HBM_contig318055_s139710c8_gene1   | 4-hydroxy-3-methylbut-2-enyl diphosphate reductase          | 1.17.1.2  | 3       |
| HBM_contig276900_s122507c5_gene1   |                                                             |           |         |
| HBM_contig297371_s130496_gene1     |                                                             |           |         |
| HBM_contig1074439_s372022c11_gene1 | 6-phosphofructokinase                                       | 2.7.1.11  | 5       |
| HBM_contig1164696_s393417c29_gene2 |                                                             |           |         |
| HBM_contig396545_s178492_gene1     |                                                             |           |         |
| HBM_contig434052_s198679c8_gene2   |                                                             |           |         |
| HBM_contig945098_s342802c4_gene3   |                                                             |           |         |
| HBM_contig1302790_s414786c2_gene1  | 6-phosphogluconate dehydrogenase                            | 1.1.1.44  | 3       |
| HBM_contig1374823_s472809c3_gene1  |                                                             |           |         |
| HBM_contig289576_s127312c17_gene3  |                                                             |           |         |
| HBM_contig368493_s163834c3_gene1   | 6-phosphogluconolactonase                                   | 3.1.1.31  | 1       |
| HBM_contig338536_s149176c3_gene1   | Acetyl-CoA C-acetyltransferase                              | 2.3.1.9   | 3       |
| HBM_contig407283_s184142c3_gene1   |                                                             |           |         |
| HBM_contig440778_s202339_gene1     |                                                             |           |         |
| HBM_contig298278_s130904c3_gene3   | Acid phosphatase                                            | 3.1.3.2   | 12      |
| HBM_contig670075_s281714c1_gene1   |                                                             |           |         |
| HBM_contig134158_s58687c27_gene1   |                                                             |           |         |
| HBM_contig355008_s157135c8_gene1   |                                                             |           |         |
| HBM_contig438518_s201108c18_gene1  |                                                             |           |         |
| HBM_contig1494088_s582224c2_gene2  |                                                             |           |         |

|                                    |                                                            |           |    |
|------------------------------------|------------------------------------------------------------|-----------|----|
| HBM_contig323185_s142103c31_gene1  |                                                            |           |    |
| HBM_contig348258_s153791c20_gene1  |                                                            |           |    |
| HBM_contig1409221_s506095c5_gene3  |                                                            |           |    |
| HBM_contig1016681_s361260c5_gene1  |                                                            |           |    |
| HBM_contig431766_s197470c4_gene1   |                                                            |           |    |
| HBM_contig1409222_s506095c6_gene1  |                                                            |           |    |
| HBM_contig147570_s64869c11_gene1   | Aconitate hydratase                                        | 4.2.1.3   | 2  |
| HBM_contig907698_s335276c27_gene1  |                                                            |           |    |
| HBM_contig1292498_s410603c18_gene2 | Aldose 1-epimerase                                         | 5.1.3.3   | 2  |
| HBM_contig1318907_s424517c3_gene1  |                                                            |           |    |
| HBM_contig318329_s139806c20_gene1  | Alpha, alpha-trehalase                                     | 3.2.1.28  | 2  |
| HBM_contig1318212_s423994c4_gene1  |                                                            |           |    |
| HBM_contig285982_s125966c2_gene2   | Alpha-amylase                                              | 3.2.1.1   | 2  |
| HBM_contig393825_s177072c1_gene1   |                                                            |           |    |
| HBM_contig1022739_s362558c6_gene2  | Alpha-glucosidase                                          | 3.2.1.20  | 2  |
| HBM_contig286418_s126148c2_gene1   |                                                            |           |    |
| HBM_contig1357960_s456977c8_gene3  | ATP citrate synthase                                       | 2.3.3.8   | 4  |
| HBM_contig298249_s130891c6_gene1   |                                                            |           |    |
| HBM_contig340487_s150149c5_gene1   |                                                            |           |    |
| HBM_contig756485_s300037c2_gene5   |                                                            |           |    |
| HBM_contig1038211_s365857c8_gene3  | Hexokinase/Glucokinase                                     | 2.7.1.1/  | 14 |
| HBM_contig1038212_s365857c9_gene1  |                                                            | 2.7.1.2   |    |
| HBM_contig1161305_s392766c5_gene2  |                                                            |           |    |
| HBM_contig1302222_s414481c14_gene1 |                                                            |           |    |
| HBM_contig1348390_s448422c26_gene1 |                                                            |           |    |
| HBM_contig264692_s117484c7_gene1   |                                                            |           |    |
| HBM_contig274496_s121527c2_gene1   |                                                            |           |    |
| HBM_contig355900_s157502c9_gene1   |                                                            |           |    |
| HBM_contig1302222_s414481c14_gene1 |                                                            |           |    |
| HBM_contig1348390_s448422c26_gene1 |                                                            |           |    |
| HBM_contig264692_s117484c7_gene1   |                                                            |           |    |
| HBM_contig274496_s121527c2_gene1   |                                                            |           |    |
| HBM_contig313150_s137410c19_gene1  |                                                            |           |    |
| HBM_contig355900_s157502c9_gene1   |                                                            |           |    |
| HBM_contig1289509_s409944c2_gene1  | $\beta$ -fructofuranosidase/ Fructan $\beta$ -fructosidase | 3.2.1.26/ | 34 |
| HBM_contig1303515_s415144c5_gene1  |                                                            | 3.2.1.80  |    |
| HBM_contig1324950_s428974c9_gene1  |                                                            |           |    |
| HBM_contig1345306_s445741c4_gene1  |                                                            |           |    |
| HBM_contig1352768_s452278c9_gene1  |                                                            |           |    |
| HBM_contig1357953_s456977c1_gene1  |                                                            |           |    |
| HBM_contig232810_s103616c2_gene3   |                                                            |           |    |
| HBM_contig232867_s103635c14_gene1  |                                                            |           |    |
| HBM_contig299515_s131427c8_gene1   |                                                            |           |    |
| HBM_contig303742_s133305c3_gene1   |                                                            |           |    |
| HBM_contig336329_s148152c12_gene1  |                                                            |           |    |

|                                   |                                        |          |   |
|-----------------------------------|----------------------------------------|----------|---|
| HBM_contig425247_s193932c4_gene2  |                                        |          |   |
| HBM_contig09843_s04035c2_gene1    |                                        |          |   |
| HBM_contig1030687_s364424c2_gene1 |                                        |          |   |
| HBM_contig1030688_s364424c3_gene1 |                                        |          |   |
| HBM_contig1119081_s384118c2_gene1 |                                        |          |   |
| HBM_contig1119082_s384118c3_gene1 |                                        |          |   |
| HBM_contig1303515_s415144c5_gene1 |                                        |          |   |
| HBM_contig1308208_s417615c6_gene2 |                                        |          |   |
| HBM_contig1352768_s452278c9_gene1 |                                        |          |   |
| HBM_contig1357953_s456977c1_gene1 |                                        |          |   |
| HBM_contig232810_s103616c2_gene3  |                                        |          |   |
| HBM_contig279164_s123369c13_gene5 |                                        |          |   |
| HBM_contig283350_s124975c7_gene1  |                                        |          |   |
| HBM_contig299515_s131427c8_gene1  |                                        |          |   |
| HBM_contig303742_s133305c3_gene1  |                                        |          |   |
| HBM_contig323410_s142207c17_gene1 |                                        |          |   |
| HBM_contig326170_s143445_gene1    |                                        |          |   |
| HBM_contig336323_s148152c6_gene1  |                                        |          |   |
| HBM_contig336327_s148152c10_gene2 |                                        |          |   |
| HBM_contig336329_s148152c12_gene1 |                                        |          |   |
| HBM_contig369602_s164404_gene1    |                                        |          |   |
| HBM_contig425247_s193932c4_gene2  |                                        |          |   |
| HBM_contig819355_s316235_gene1    |                                        |          |   |
| HBM_contig1322037_s426750c3_gene1 | Carbonate dehydratase                  | 4.2.1.1  | 5 |
| HBM_contig1352352_s451908c3_gene2 |                                        |          |   |
| HBM_contig285737_s125861c3_gene1  |                                        |          |   |
| HBM_contig343186_s151438c8_gene1  |                                        |          |   |
| HBM_contig383816_s171800_gene1    |                                        |          |   |
| HBM_contig366916_s163044c2_gene1  | Citrate (Si) synthase                  | 2.3.3.1  | 1 |
| HBM_contig1289286_s409907c6_gene1 | Rubber cis-polyisoprenylcistransferase | 2.5.1.20 | 3 |
| HBM_contig272314_s120676_gene1    |                                        |          |   |
| HBM_contig919895_s338071c2_gene1  |                                        |          |   |
| HBM_contig257034_s114160c16_gene1 | Dihydrolipoamide dehydrogenase         | 1.8.1.4  | 4 |
| HBM_contig316009_s138773_gene1    |                                        |          |   |
| HBM_contig393998_s177156c10_gene1 |                                        |          |   |
| HBM_contig484019_s225263c9_gene1  |                                        |          |   |
| HBM_contig1311115_s419277c5_gene1 | Dimethylallyltranstransferase          | 2.5.1.1  | 2 |
| HBM_contig526985_s245906c4_gene1  |                                        |          |   |
| HBM_contig656003_s279612c2_gene3  | Diphosphomevalonate decarboxylase      | 4.1.1.33 | 3 |
| HBM_contig1061580_s369994_gene1   |                                        |          |   |
| HBM_contig1294315_s411141c4_gene1 |                                        |          |   |
| HBM_contig1305637_s416164c2_gene1 | Farnesyl diphosphate synthase          | 2.5.1.10 | 4 |
| HBM_contig657916_s279871c2_gene2  |                                        |          |   |
| HBM_contig290987_s127806c1_gene1  |                                        |          |   |
| HBM_contig290988_s127806c2_gene1  |                                        |          |   |

|                                    |                                          |          |   |
|------------------------------------|------------------------------------------|----------|---|
| HBM_contig1311115_s419277c5_gene1  | Geranyl geranyl diphosphate synthase     | 2.5.1.29 | 7 |
| HBM_contig253780_s112770c3_gene1   |                                          |          |   |
| HBM_contig1292487_s410603c7_gene1  |                                          |          |   |
| HBM_contig1298993_s412919c4_gene1  |                                          |          |   |
| HBM_contig550434_s255571_gene1     |                                          |          |   |
| HBM_contig324001_gene1             |                                          |          |   |
| HBM_contig324027_gene1             |                                          |          |   |
| HBM_contig1289171_s409884c2_gene1  | Fructose-bisphosphate aldolase           | 4.1.2.13 | 9 |
| HBM_contig1303826_s415277c9_gene1  |                                          |          |   |
| HBM_contig1322658_s427165c3_gene3  |                                          |          |   |
| HBM_contig1339227_s440512c5_gene3  |                                          |          |   |
| HBM_contig180992_s80187c5_gene1    |                                          |          |   |
| HBM_contig316188_s138852c6_gene2   |                                          |          |   |
| HBM_contig320635_s140865c2_gene1   |                                          |          |   |
| HBM_contig339478_s149632c15_gene2  |                                          |          |   |
| HBM_contig522414_s243848c9_gene1   |                                          |          |   |
| HBM_contig214134_s95238c3_gene1    | Glucose 1-phosphate adenylyl transferase | 2.7.7.27 | 5 |
| HBM_contig285749_s125863c8_gene2   |                                          |          |   |
| HBM_contig391064_s175615c5_gene1   |                                          |          |   |
| HBM_contig418176_s190089c6_gene1   |                                          |          |   |
| HBM_contig743614_s296819c6_gene1   |                                          |          |   |
| HBM_contig1357958_s456977c6_gene3  | Glucose-6-phosphate 1-dehydrogenase      | 1.1.1.49 | 2 |
| HBM_contig276796_s122460c2_gene1   |                                          |          |   |
| HBM_contig339226_s149517c1_gene1   | Glucose-6-phosphate 1-epimerase          | 5.1.3.15 | 2 |
| HBM_contig1313987_s421061c3_gene1  |                                          |          |   |
| HBM_contig362889_s161039c11_gene1  | Glucose-6-phosphate isomerase            | 5.3.1.9  | 1 |
| HBM_contig1288678_s409802c20_gene2 | Glyceraldehyde 3-phosphate dehydrogenase | 1.2.1.12 | 7 |
| HBM_contig1340694_s441737c10_gene1 |                                          |          |   |
| HBM_contig218121_s97036c9_gene1    |                                          |          |   |
| HBM_contig342711_s151221c4_gene1   |                                          |          |   |
| HBM_contig130132_s56830c9_gene1    |                                          |          |   |
| HBM_contig163761_s72322c28_gene1   |                                          |          |   |
| HBM_contig474498_s220352c2_gene1   |                                          |          |   |
| HBM_contig342780_s151248c4_gene1   | Glycogen (starch) phosphorylase          | 2.4.1.1  | 1 |
| HBM_contig1290182_s410061c3_gene1  | Hydroxymethyl glutaryl-CoA reductase     | 1.1.1.34 | 5 |
| HBM_contig269042_s119264c2_gene1   |                                          |          |   |
| HBM_contig411305_s186349c9_gene1   |                                          |          |   |
| HBM_contig454459_s209676c4_gene1   |                                          |          |   |
| HBM_contig382803_s171253_gene1     |                                          |          |   |
| HBM_contig1303558_s415149c3_gene1  | Hydroxymethylglutaryl-CoA synthase       | 2.3.3.10 | 2 |
| HBM_contig265284_s117727c3_gene4   |                                          |          |   |
| HBM_contig243087_s108198c7_gene1   | Isocitrate dehydrogenase                 | 1.1.1.42 | 2 |
| HBM_contig354346_s156820c5_gene1   |                                          |          |   |
| HBM_contig501437_s233949c28_gene1  | Isopentenyl-diphosphate delta-isomerase  | 5.3.3.2  | 3 |
| HBM_contig326011_s143366_gene1     |                                          |          |   |

|                                    |                                                     |           |    |
|------------------------------------|-----------------------------------------------------|-----------|----|
| HBM_contig284636_s125486_gene1     |                                                     |           |    |
| HBM_contig01222_s00535c3_gene1     | L-malate hydro-lyase/ fumarate hydratase            | 4.2.1.2   | 1  |
| HBM_contig1293296_s410821c9_gene1  | Malate dehydrogenase                                | 1.1.1.37  | 10 |
| HBM_contig1295328_s411484c1_gene1  |                                                     |           |    |
| HBM_contig284161_s125295c10_gene2  |                                                     |           |    |
| HBM_contig332061_s146156c4_gene2   |                                                     |           |    |
| HBM_contig675650_s282628_gene1     |                                                     |           |    |
| HBM_contig1293296_s410821c9_gene1  |                                                     |           |    |
| HBM_contig1295328_s411484c1_gene1  |                                                     |           |    |
| HBM_contig284161_s125295c10_gene2  |                                                     |           |    |
| HBM_contig332061_s146156c4_gene2   |                                                     |           |    |
| HBM_contig675650_s282628_gene1     |                                                     |           |    |
| HBM_contig1324605_s428704c13_gene4 | Malate dehydrogenase (decarboxylating)/             | 1.1.1.39/ | 7  |
| HBM_contig285159_s125660c12_gene1  | Malate dehydrogenase (oxaloacetate-decarboxylating) | 1.1.1.40  |    |
| HBM_contig673366_s282240c3_gene1   |                                                     |           |    |
| HBM_contig721178_s292728c3_gene1   |                                                     |           |    |
| HBM_contig285159_s125660c12_gene1  |                                                     |           |    |
| HBM_contig673366_s282240c3_gene1   |                                                     |           |    |
| HBM_contig721178_s292728c3_gene1   |                                                     |           |    |
| HBM_contig1295671_s411600c1_gene1  | Mevalonate kinase                                   | 2.7.1.36  | 2  |
| HBM_contig1300792_s413756c8_gene1  |                                                     |           |    |
| HBM_contig819783_s316335c3_gene1   | Mitochondrial dicarboxylate carrier protein (DIC)   | na        | 3  |
| HBM_contig278880_s123280_gene1     |                                                     |           |    |
| HBM_contig362882_s161039c4_gene3   |                                                     |           |    |
| HBM_contig325647_s143203_gene1     | Monocarboxylate porter (MCP)                        | na        | 1  |
| HBM_contig113175_s49095c7_gene1    | Monosaccharide transporter (MT)                     | na        | 24 |
| HBM_contig1289350_s409914c30_gene1 |                                                     |           |    |
| HBM_contig1293510_s410890c6_gene1  |                                                     |           |    |
| HBM_contig1294848_s411334c2_gene2  |                                                     |           |    |
| HBM_contig205504_s91271c2_gene1    |                                                     |           |    |
| HBM_contig246731_s109760c5_gene1   |                                                     |           |    |
| HBM_contig253707_s112736c8_gene1   |                                                     |           |    |
| HBM_contig300103_s131701_gene1     |                                                     |           |    |
| HBM_contig301843_s132492c5_gene1   |                                                     |           |    |
| HBM_contig335154_s147607c4_gene1   |                                                     |           |    |
| HBM_contig338935_s149375c12_gene1  |                                                     |           |    |
| HBM_contig369354_s164271_gene1     |                                                     |           |    |
| HBM_contig377316_s168363c3_gene1   |                                                     |           |    |
| HBM_contig383251_s171496c1_gene1   |                                                     |           |    |
| HBM_contig383942_s171864_gene1     |                                                     |           |    |
| HBM_contig392526_s176392c5_gene1   |                                                     |           |    |
| HBM_contig395725_s178055_gene1     |                                                     |           |    |
| HBM_contig408839_s185016_gene1     |                                                     |           |    |
| HBM_contig414079_s187868_gene1     |                                                     |           |    |
| HBM_contig446109_s205232c1_gene1   |                                                     |           |    |

|                                    |                                                          |          |   |
|------------------------------------|----------------------------------------------------------|----------|---|
| HBM_contig446110_s205232c2_gene2   |                                                          |          |   |
| HBM_contig656790_gene1             |                                                          |          |   |
| HBM_contig757308_s300336c4_gene2   |                                                          |          |   |
| HBM_contig766992_s302901c1_gene1   |                                                          |          |   |
| HBM_contig303759_s133310c8_gene1   | NADP-dependentglyceraldehyde-3-phosphatedehydrogenase    | 1.2.1.9  | 1 |
| HBM_contig1354496_s453822c10_gene2 | Oxoglutarate:malate antiporter (OMT)                     | na       | 7 |
| HBM_contig231307_s102930c15_gene1  |                                                          |          |   |
| HBM_contig302254_s132663c8_gene1   |                                                          |          |   |
| HBM_contig728764_s293779c7_gene1   |                                                          |          |   |
| HBM_contig1354496_s453822c10_gene2 |                                                          |          |   |
| HBM_contig231307_s102930c15_gene1  |                                                          |          |   |
| HBM_contig302254_s132663c8_gene1   |                                                          |          |   |
| HBM_contig1302285_s414518c3_gene1  | Dicarboxylate/Tricarboxylate carrier protein (DTC)       | na       | 1 |
| HBM_contig1029566_s364163_gene1    | Phosphoenolpyruvate-phosphatase                          | 3.1.3.60 | 5 |
| HBM_contig1289192_s409889c5_gene1  |                                                          |          |   |
| HBM_contig134158_s58687c27_gene1   |                                                          |          |   |
| HBM_contig22381_s09035c12_gene1    |                                                          |          |   |
| HBM_contig325046_s142945_gene1     |                                                          |          |   |
| HBM_contig1305977_s416315c19_gene1 | Phosphoglucomutase                                       | 5.4.2.2  | 2 |
| HBM_contig422634_s192523c3_gene2   |                                                          |          |   |
| HBM_contig747716_s298021c22_gene1  | Phosphoglycerate kinase                                  | 2.7.2.3  | 1 |
| HBM_contig323198_s142103c44_gene1  | Phosphoglycerate mutase                                  | 5.4.2.1  | 3 |
| HBM_contig349580_s154385c27_gene1  |                                                          |          |   |
| HBM_contig389245_s174714c12_gene1  |                                                          |          |   |
| HBM_contig433979_s198650c9_gene1   | Phosphomevalonatekinase                                  | 2.7.4.2  | 3 |
| HBM_contig227302_s101115c1_gene1   |                                                          |          |   |
| HBM_contig297356_s130487_gene1     |                                                          |          |   |
| HBM_contig295239_s129579c5_gene1   | Phosphopyruvate hydratase (enolase)                      | 4.2.1.11 | 1 |
| HBM_contig1289256_s409900_gene1    | Oligo-1,6-glucosidase                                    | 3.2.1.10 | 2 |
| HBM_contig298771_s131111c1_gene1   |                                                          |          |   |
| HBM_contig1290187_s410061c8_gene3  | Pyrophosphate--fructose-6-phosphate 1-phosphotransferase | 2.7.1.90 | 2 |
| HBM_contig334050_s147096c2_gene1   |                                                          |          |   |
| HBM_contig433980_s198650c10_gene1  | Pyruvate dehydrogenase                                   | 1.2.4.1  | 6 |
| HBM_contig1301528_s414125c2_gene1  |                                                          |          |   |
| HBM_contig1311068_s419250c5_gene1  |                                                          |          |   |
| HBM_contig30266_s12350c4_gene1     |                                                          |          |   |
| HBM_contig1290757_s410195c9_gene1  |                                                          |          |   |
| HBM_contig1294128_s411073c7_gene1  |                                                          |          |   |
| HBM_contig101953_s43997c3_gene2    | Dihydrolipoyllysine-residue acetyl transferase           | 2.3.1.12 | 4 |
| HBM_contig299370_s131382_gene1     |                                                          |          |   |
| HBM_contig397018_s178729c12_gene1  |                                                          |          |   |
| HBM_contig402074_s181422c8_gene1   |                                                          |          |   |
| HBM_contig1026725_s363504c2_gene2  | Pyruvate kinase                                          | 2.7.1.40 | 8 |
| HBM_contig1297534_s412313c2_gene1  |                                                          |          |   |

|                                    |                                      |          |    |
|------------------------------------|--------------------------------------|----------|----|
| HBM_contig1304126_s415411c3_gene1  |                                      |          |    |
| HBM_contig1344950_s445443c5_gene5  |                                      |          |    |
| HBM_contig136768_s59843c7_gene1    |                                      |          |    |
| HBM_contig290846_s127748c7_gene1   |                                      |          |    |
| HBM_contig383462_s171609c3_gene1   |                                      |          |    |
| HBM_contig294978_s129482c1_gene1   |                                      |          |    |
| HBM_contig114975_s49906c13_gene1   | Ribose 5-phosphate isomerase A       | 5.3.1.6  | 3  |
| HBM_contig1312636_s420192c3_gene1  |                                      |          |    |
| HBM_contig346662_s153048c28_gene3  |                                      |          |    |
| HBM_contig304780_s133706c10_gene2  | Ribulose-phosphate 3-epimerase       | 5.1.3.1  | 1  |
| HBM_contig1314787_s421584c1_gene1  | Rubber elongation factor (REF)       | na       | 12 |
| HBM_contig1314789_s421584c3_gene1  |                                      |          |    |
| HBM_contig1352860_s452368_gene1    |                                      |          |    |
| HBM_contig1432969_s529413_gene1    |                                      |          |    |
| HBM_contig210302_s93430_gene1      |                                      |          |    |
| HBM_contig246314_s109563_gene1     |                                      |          |    |
| HBM_contig285004_s125605_gene1     |                                      |          |    |
| HBM_contig289068_s127107_gene1     |                                      |          |    |
| HBM_contig331924_s146093c6_gene1   |                                      |          |    |
| HBM_contig331929_s146093c11_gene1  |                                      |          |    |
| HBM_contig420863_s191570c9_gene1   |                                      |          |    |
| HBM_contig953976_gene1             |                                      |          |    |
| HBM_contig1291168_s410297_gene2    | Small rubber particle protein (SRPP) | na       | 10 |
| HBM_contig1314791_s421584c5_gene1  |                                      |          |    |
| HBM_contig1351062_s450759c14_gene1 |                                      |          |    |
| HBM_contig1445641_s541695c60_gene1 |                                      |          |    |
| HBM_contig314926_s138259_gene1     |                                      |          |    |
| HBM_contig331920_s146093c2_gene1   |                                      |          |    |
| HBM_contig331921_s146093c3_gene1   |                                      |          |    |
| HBM_contig331923_s146093c5_gene1   |                                      |          |    |
| HBM_contig364556_s161856_gene1     |                                      |          |    |
| HBM_contig878396_gene1             |                                      |          |    |
| HBM_contig164849_s72856c4_gene2    | Starch synthase                      | 2.4.1.21 | 7  |
| HBM_contig230057_s102351c21_gene1  |                                      |          |    |
| HBM_contig306687_s134504c10_gene1  |                                      |          |    |
| HBM_contig332846_s146521c1_gene1   |                                      |          |    |
| HBM_contig943860_s342523c1_gene1   |                                      |          |    |
| HBM_contig1289127_s409874c9_gene1  |                                      |          |    |
| HBM_contig1318935_s424517c31_gene1 |                                      |          |    |
| HBM_contig1348382_s448422c18_gene1 | Phosphoenolpyruvate carboxykinase    | 4.1.1.49 | 3  |
| HBM_contig309950_s135961c7_gene1   |                                      |          |    |
| HBM_contig329252_s144873c5_gene3   |                                      |          |    |
| HBM_contig290756_s127709c10_gene1  | Succinate dehydrogenase              | 1.3.5.1  | 2  |
| HBM_contig509596_s237846c7_gene1   |                                      |          |    |
| HBM_contig348246_s153791c8_gene2   | Succinyl-CoA ligase                  | 6.2.1.5  | 2  |

|                                    |                                                   |          |    |
|------------------------------------|---------------------------------------------------|----------|----|
| HBM_contig363653_s161426_gene1     |                                                   |          |    |
| HBM_contig227922_s101408c5_gene1   | Pyruvate decarboxylase                            | 4.1.1.1  | 2  |
| HBM_contig369579_s164395c1_gene1   |                                                   |          |    |
| HBM_contig213287_s94844c20_gene1   | Aldehyde dehydrogenase                            | 1.2.1.3  | 3  |
| HBM_contig325083_s142963_gene1     |                                                   |          |    |
| HBM_contig378330_s168914c2_gene2   |                                                   |          |    |
| HBM_contig378047_s168772_gene1     | Alcohol dehydrogenase                             | 1.1.1.1  | 2  |
| HBM_contig1292652_s410638c8_gene2  |                                                   |          |    |
| HBM_contig63343_s26589c5_gene1     | l-lactate dehydrogenase                           | 1.1.1.27 | 2  |
| HBM_contig1254051_s405310c12_gene1 |                                                   |          |    |
| HBM_contig202157_s89781c2_gene1    | Acetyl-CoA ligase                                 | 6.2.1.1  | 2  |
| HBM_contig770884_s304118c4_gene1   |                                                   |          |    |
| HBM_contig403677_s182258c2_gene1   | Trehalose phosphatase                             | 3.1.3.12 | 10 |
| HBM_contig1289511_s409944c4_gene3  |                                                   |          |    |
| HBM_contig371632_s165417c5_gene1   |                                                   |          |    |
| HBM_contig1324951_s428974c10_gene1 |                                                   |          |    |
| HBM_contig1420163_s516850c9_gene1  |                                                   |          |    |
| HBM_contig451554_s208132c13_gene1  |                                                   |          |    |
| HBM_contig353116_s156220_gene1     |                                                   |          |    |
| HBM_contig431760_s197468c3_gene3   |                                                   |          |    |
| HBM_contig1288955_s409848c4_gene1  |                                                   |          |    |
| HBM_contig1332985_s435332c13_gene1 |                                                   |          |    |
| HBM_contig1352489_s452038_gene1    | 4-hydroxy-3-methylbut-2-enyl-diphosphate synthase | 1.17.7.1 | 3  |
| HBM_contig328275_s144399c2_gene1   |                                                   |          |    |
| HBM_contig433089_s198173c7_gene1   |                                                   |          |    |
| HBM_contig1289509_s409944c2_gene1  | Sucrose -fructosyltransferase                     | 2.4.1.99 | 2  |
| HBM_contig1345306_s445741c4_gene1  |                                                   |          |    |
| HBM_contig1288687_s409803c1_gene1  | Sucrose phosphate phosphatase                     | 3.1.3.24 | 2  |
| HBM_contig272605_s120794c27_gene1  |                                                   |          |    |
| HBM_contig757629_s300436c6_gene1   | Sucrose phosphate synthase                        | 2.4.1.14 | 4  |
| HBM_contig771203_s304239c15_gene1  |                                                   |          |    |
| HBM_contig1463859_s558603c4_gene1  |                                                   |          |    |
| HBM_contig355822_s157485c2_gene1   |                                                   |          |    |
| HBM_contig01226_s00535c7_gene1     | Sucrose synthase                                  | 2.4.1.13 | 8  |
| HBM_contig1310976_s419196c4_gene1  |                                                   |          |    |
| HBM_contig281038_s124058c3_gene2   |                                                   |          |    |
| HBM_contig395231_s177780c5_gene1   |                                                   |          |    |
| HBM_contig513220_s239591c6_gene3   |                                                   |          |    |
| HBM_contig314089_s137872_gene1     |                                                   |          |    |
| HBM_contig1294277_s411129_gene1    |                                                   |          |    |
| HBM_contig281039_s124058c4_gene1   |                                                   |          |    |
| HBM_contig47165_s19567c3_gene2     | Sucrose transporter (SUT)                         | na       | 14 |
| HBM_contig1109905_s381969_gene1    |                                                   |          |    |
| HBM_contig1289974_s410033c6_gene1  |                                                   |          |    |
| HBM_contig1299594_s413194c9_gene1  |                                                   |          |    |

|                                    |                                            |          |   |
|------------------------------------|--------------------------------------------|----------|---|
| HBM_contig1301388_s414043_gene1    |                                            |          |   |
| HBM_contig1323260_s427655_gene1    |                                            |          |   |
| HBM_contig332408_s146322c13_gene1  |                                            |          |   |
| HBM_contig332409_s146322c14_gene1  |                                            |          |   |
| HBM_contig380380_s169971_gene1     |                                            |          |   |
| HBM_contig429984_s196523_gene1     |                                            |          |   |
| HBM_contig43409_s17931_gene1       |                                            |          |   |
| HBM_contig47165_s19567c3_gene2     |                                            |          |   |
| HBM_contig654533_s279397c2_gene1   |                                            |          |   |
| HBM_contig205504_s91271c2_gene1    |                                            |          |   |
| HBM_contig346208_s152843c5_gene1   | Transaldolase                              | 2.2.1.2  | 1 |
| HBM_contig1125285_s385576c12_gene1 | Transketolase                              | 2.2.1.1  | 2 |
| HBM_contig324592_s142744_gene1     |                                            |          |   |
| HBM_contig277898_s122911c5_gene1   | Trehalose-6-phosphate synthase             | 2.4.1.15 | 2 |
| HBM_contig273515_s121147c18_gene2  |                                            |          |   |
| HBM_contig1317309_s423378c2_gene1  | Triosephosphate isomerase                  | 5.3.1.1  | 2 |
| HBM_contig1364363_s462960c8_gene1  |                                            |          |   |
| HBM_contig354344_s156820c3_gene1   | UTP-glucose-1-phosphateuridylyltransferase | 2.7.7.9  | 1 |
| HBM_contig1356982_s456101_gene1    | Undecaprenyl-diphosphate synthase          | 2.5.1.31 | 5 |
| HBM_contig379004_s169268c2_gene1   |                                            |          |   |
| HBM_contig1329326_s432359c2_gene3  |                                            |          |   |
| HBM_contig379006_s169268c4_gene1   |                                            |          |   |
| HBM_contig232787_s103605c15_gene1  |                                            |          |   |
| HBM_contig1311114_s419277c4_gene1  | Galtase                                    | 2.4.1.-  | 5 |
| HBM_contig1323470_s427819c4_gene1  |                                            |          |   |
| HBM_contig1013854_s360717c11_gene3 |                                            |          |   |
| HBM_contig1299176_s413002_gene1    |                                            |          |   |
| HBM_contig1311113_s419277c3_gene2  |                                            |          |   |

**Table S17.** Rubber biosynthesis related genes of *H. brasiliensis* in comparison to *Parthenium argentatum* (guayule) ESTs

| Gene model                         | No. of EST hits <sup>a</sup> | Lowest E-value <sup>b</sup> | Greatest identity % <sup>b</sup> |
|------------------------------------|------------------------------|-----------------------------|----------------------------------|
| HBM_contig1297534_s412313c2_gene1  | 8                            | 4.63E-133                   | 98                               |
| HBM_contig362889_s161039c11_gene1  | 2                            | 2.43E-24                    | 98                               |
| HBM_contig1352489_s452038_gene1    | 5                            | 1.67E-35                    | 97                               |
| HBM_contig1288739_s409811c4_gene1  | 9                            | 3.72E-95                    | 96                               |
| HBM_contig1374823_s472809c3_gene1  | 7                            | 3.57E-88                    | 96                               |
| HBM_contig301843_s132492c5_gene1   | 5                            | 4.19E-85                    | 96                               |
| HBM_contig340487_s150149c5_gene1   | 6                            | 8.66E-111                   | 96                               |
| HBM_contig756485_s300037c2_gene5   | 5                            | 1.23E-109                   | 96                               |
| HBM_contig1357960_s456977c8_gene3  | 44                           | 8.16E-124                   | 95                               |
| HBM_contig163761_s72322c28_gene1   | 35                           | 5.62E-94                    | 95                               |
| HBM_contig770884_s304118c4_gene1   | 18                           | 6.89E-53                    | 95                               |
| HBM_contig1288678_s409802c20_gene2 | 37                           | 4.02E-122                   | 94                               |
| HBM_contig1301528_s414125c2_gene1  | 7                            | 1.99E-47                    | 94                               |
| HBM_contig328275_s144399c2_gene1   | 9                            | 6.93E-126                   | 94                               |
| HBM_contig339478_s149632c15_gene2  | 21                           | 1.00E-117                   | 94                               |
| HBM_contig342711_s151221c4_gene1   | 37                           | 3.20E-119                   | 94                               |
| HBM_contig433089_s198173c7_gene1   | 9                            | 1.37E-125                   | 94                               |
| HBM_contig766992_s302901c1_gene1   | 6                            | 1.06E-83                    | 94                               |
| HBM_contig1302285_s414518c3_gene1  | 39                           | 2.12E-98                    | 93                               |
| HBM_contig1302790_s414786c2_gene1  | 8                            | 7.77E-118                   | 93                               |
| HBM_contig147570_s64869c11_gene1   | 16                           | 2.14E-114                   | 93                               |
| HBM_contig294978_s129482c1_gene1   | 8                            | 1.78E-96                    | 93                               |
| HBM_contig338935_s149375c12_gene1  | 5                            | 9.15E-77                    | 93                               |
| HBM_contig346208_s152843c5_gene1   | 11                           | 6.42E-113                   | 93                               |
| HBM_contig522414_s243848c9_gene1   | 23                           | 5.14E-135                   | 93                               |
| HBM_contig675650_s282628_gene1     | 11                           | 1.46E-103                   | 93                               |
| HBM_contig1289171_s409884c2_gene1  | 23                           | 3.97E-135                   | 92                               |
| HBM_contig1299176_s413002_gene1    | 22                           | 2.30E-98                    | 92                               |
| HBM_contig130132_s56830c9_gene1    | 35                           | 1.47E-120                   | 92                               |
| HBM_contig1307528_s417190c7_gene1  | 7                            | 1.17E-52                    | 92                               |
| HBM_contig180992_s80187c5_gene1    | 21                           | 1.66E-131                   | 92                               |
| HBM_contig289576_s127312c17_gene3  | 9                            | 5.65E-115                   | 92                               |
| HBM_contig295239_s129579c5_gene1   | 22                           | 3.95E-127                   | 92                               |
| HBM_contig343183_s151438c5_gene1   | 4                            | 1.09E-60                    | 92                               |
| HBM_contig907698_s335276c27_gene1  | 10                           | 3.22E-113                   | 92                               |
| HBM_contig1326688_s430296c2_gene2  | 10                           | 6.66E-89                    | 91                               |
| HBM_contig1340694_s441737c10_gene1 | 36                           | 8.63E-119                   | 91                               |
| HBM_contig217879_s96943c3_gene1    | 9                            | 4.76E-88                    | 91                               |
| HBM_contig326011_s143366_gene1     | 7                            | 8.30E-79                    | 91                               |
| HBM_contig484019_s225263c9_gene1   | 13                           | 1.91E-110                   | 91                               |
| HBM_contig1324605_s428704c13_gene4 | 7                            | 5.58E-106                   | 90                               |
| HBM_contig1339227_s440512c5_gene3  | 22                           | 1.09E-130                   | 90                               |

|                                   |    |           |    |
|-----------------------------------|----|-----------|----|
| HBM_contig136768_s59843c7_gene1   | 10 | 4.18E-111 | 90 |
| HBM_contig290988_s127806c2_gene1  | 2  | 9.62E-11  | 90 |
| HBM_contig354346_s156820c5_gene1  | 7  | 3.22E-95  | 90 |
| HBM_contig382299_s170997c9_gene2  | 4  | 1.16E-130 | 90 |
| HBM_contig411305_s186349c9_gene1  | 8  | 1.02E-96  | 90 |
| HBM_contig418176_s190089c6_gene1  | 5  | 8.17E-103 | 90 |
| HBM_contig454459_s209676c4_gene1  | 17 | 2.33E-93  | 90 |
| HBM_contig743614_s296819c6_gene1  | 15 | 1.76E-107 | 90 |
| HBM_contig1292652_s410638c8_gene2 | 34 | 6.96E-104 | 89 |
| HBM_contig1322658_s427165c3_gene3 | 22 | 1.09E-129 | 89 |
| HBM_contig1352768_s452278c9_gene1 | 2  | 7.10E-123 | 89 |
| HBM_contig284161_s125295c10_gene2 | 10 | 1.93E-107 | 89 |
| HBM_contig297371_s130496_gene1    | 15 | 7.42E-89  | 89 |
| HBM_contig303742_s133305c3_gene1  | 3  | 1.25E-122 | 89 |
| HBM_contig323410_s142207c17_gene1 | 5  | 2.93E-123 | 89 |
| HBM_contig354344_s156820c3_gene1  | 12 | 1.65E-97  | 89 |
| HBM_contig378330_s168914c2_gene2  | 12 | 4.61E-103 | 89 |
| HBM_contig1290187_s410061c8_gene3 | 19 | 2.89E-63  | 88 |
| HBM_contig1293296_s410821c9_gene1 | 10 | 3.69E-107 | 88 |
| HBM_contig1310976_s419196c4_gene1 | 5  | 6.73E-111 | 88 |
| HBM_contig1311068_s419250c5_gene1 | 6  | 1.13E-71  | 88 |
| HBM_contig257034_s114160c16_gene1 | 13 | 4.10E-114 | 88 |
| HBM_contig269042_s119264c2_gene1  | 9  | 1.60E-106 | 88 |
| HBM_contig281038_s124058c3_gene2  | 5  | 8.27E-111 | 88 |
| HBM_contig303759_s133310c8_gene1  | 10 | 6.79E-100 | 88 |
| HBM_contig425247_s193932c4_gene2  | 2  | 5.80E-124 | 88 |
| HBM_contig474498_s220352c2_gene1  | 10 | 7.74E-101 | 88 |
| HBM_contig1290182_s410061c3_gene1 | 9  | 2.08E-90  | 87 |
| HBM_contig1311114_s419277c4_gene1 | 11 | 1.90E-46  | 87 |
| HBM_contig1344950_s445443c5_gene5 | 14 | 3.55E-51  | 87 |
| HBM_contig243087_s108198c7_gene1  | 5  | 7.55E-102 | 87 |
| HBM_contig285159_s125660c12_gene1 | 8  | 1.43E-123 | 87 |
| HBM_contig01222_s00535c3_gene1    | 3  | 4.14E-91  | 86 |
| HBM_contig1295328_s411484c1_gene1 | 10 | 6.91E-105 | 86 |
| HBM_contig1305637_s416164c2_gene1 | 4  | 5.90E-104 | 86 |
| HBM_contig1343951_s444526c6_gene1 | 9  | 8.48E-82  | 86 |
| HBM_contig227922_s101408c5_gene1  | 4  | 3.99E-44  | 86 |
| HBM_contig298249_s130891c6_gene1  | 7  | 4.29E-107 | 86 |
| HBM_contig334050_s147096c2_gene1  | 9  | 1.38E-121 | 86 |
| HBM_contig382803_s171253_gene1    | 10 | 4.62E-104 | 86 |
| HBM_contig945098_s342802c4_gene3  | 16 | 1.12E-112 | 86 |
| HBM_contig01226_s00535c7_gene1    | 8  | 8.19E-119 | 85 |
| HBM_contig272605_s120794c27_gene1 | 3  | 9.23E-26  | 85 |
| HBM_contig278880_s123280_gene1    | 51 | 1.65E-46  | 85 |
| HBM_contig304780_s133706c10_gene2 | 4  | 2.42E-98  | 85 |
| HBM_contig349580_s154385c27_gene1 | 4  | 6.90E-104 | 85 |

|                                    |    |           |    |
|------------------------------------|----|-----------|----|
| HBM_contig407283_s184142c3_gene1   | 4  | 1.70E-59  | 85 |
| HBM_contig434052_s198679c8_gene2   | 16 | 8.92E-116 | 85 |
| HBM_contig440778_s202339_gene1     | 17 | 2.69E-57  | 85 |
| HBM_contig501437_s233949c28_gene1  | 7  | 2.25E-95  | 85 |
| HBM_contig1061580_s369994_gene1    | 5  | 5.86E-53  | 84 |
| HBM_contig1074439_s372022c11_gene1 | 16 | 2.14E-114 | 84 |
| HBM_contig300103_s131701_gene1     | 6  | 7.80E-33  | 84 |
| HBM_contig402074_s181422c8_gene1   | 9  | 1.53E-58  | 84 |
| HBM_contig1125285_s385576c12_gene1 | 8  | 4.61E-51  | 83 |
| HBM_contig113175_s49095c7_gene1    | 7  | 1.04E-36  | 83 |
| HBM_contig1254051_s405310c12_gene1 | 8  | 7.39E-101 | 83 |
| HBM_contig1289350_s409914c30_gene1 | 8  | 1.31E-32  | 83 |
| HBM_contig1294315_s411141c4_gene1  | 5  | 9.78E-28  | 83 |
| HBM_contig1303558_s415149c3_gene1  | 25 | 1.78E-117 | 83 |
| HBM_contig1303826_s415277c9_gene1  | 26 | 1.49E-119 | 83 |
| HBM_contig1312636_s420192c3_gene1  | 5  | 1.40E-96  | 83 |
| HBM_contig1339539_s440773c5_gene3  | 2  | 2.63E-53  | 83 |
| HBM_contig213287_s94844c20_gene1   | 3  | 5.18E-109 | 83 |
| HBM_contig276900_s122507c5_gene1   | 4  | 5.90E-101 | 83 |
| HBM_contig318055_s139710c8_gene1   | 16 | 4.62E-120 | 83 |
| HBM_contig338536_s149176c3_gene1   | 20 | 6.37E-111 | 83 |
| HBM_contig43409_s17931_gene1       | 14 | 2.25E-85  | 83 |
| HBM_contig656003_s279612c2_gene3   | 6  | 5.54E-90  | 83 |
| HBM_contig819783_s316335c3_gene1   | 53 | 1.76E-57  | 83 |
| HBM_contig114975_s49906c13_gene1   | 10 | 6.08E-100 | 82 |
| HBM_contig316188_s138852c6_gene2   | 22 | 5.59E-115 | 82 |
| HBM_contig320635_s140865c2_gene1   | 23 | 2.35E-116 | 82 |
| HBM_contig323198_s142103c44_gene1  | 3  | 1.43E-97  | 82 |
| HBM_contig63343_s26589c5_gene1     | 8  | 4.23E-98  | 82 |
| HBM_contig673366_s282240c3_gene1   | 9  | 2.10E-123 | 82 |
| HBM_contig721178_s292728c3_gene1   | 8  | 3.99E-105 | 82 |
| HBM_contig1294128_s411073c7_gene1  | 11 | 3.54E-28  | 81 |
| HBM_contig285749_s125863c8_gene2   | 8  | 2.54E-89  | 81 |
| HBM_contig302280_s132669c17_gene1  | 4  | 9.39E-68  | 81 |
| HBM_contig314089_s137872_gene1     | 7  | 5.06E-26  | 81 |
| HBM_contig316009_s138773_gene1     | 15 | 4.26E-90  | 81 |
| HBM_contig369579_s164395c1_gene1   | 3  | 6.98E-66  | 81 |
| HBM_contig1289192_s409889c5_gene1  | 4  | 5.09E-50  | 80 |
| HBM_contig1299594_s413194c9_gene1  | 18 | 3.10E-88  | 80 |
| HBM_contig1304126_s415411c3_gene1  | 10 | 6.68E-106 | 80 |
| HBM_contig1404580_s501548c30_gene1 | 7  | 1.93E-78  | 80 |
| HBM_contig279164_s123369c13_gene5  | 3  | 3.59E-63  | 80 |
| HBM_contig377316_s168363c3_gene1   | 9  | 1.39E-92  | 80 |
| HBM_contig290846_s127748c7_gene1   | 10 | 1.05E-105 | 79 |
| HBM_contig378047_s168772_gene1     | 37 | 4.09E-72  | 79 |
| HBM_contig392526_s176392c5_gene1   | 11 | 2.15E-91  | 79 |

|                                    |    |           |    |
|------------------------------------|----|-----------|----|
| HBM_contig943860_s342523c1_gene1   | 5  | 2.89E-35  | 79 |
| HBM_contig1290757_s410195c9_gene1  | 10 | 1.39E-29  | 78 |
| HBM_contig202157_s89781c2_gene1    | 10 | 4.11E-45  | 78 |
| HBM_contig283350_s124975c7_gene1   | 3  | 9.10E-109 | 78 |
| HBM_contig299370_s131382_gene1     | 7  | 4.62E-59  | 78 |
| HBM_contig380380_s169971_gene1     | 9  | 3.19E-81  | 78 |
| HBM_contig529416_s246980c14_gene1  | 9  | 7.77E-79  | 78 |
| HBM_contig1364363_s462960c8_gene1  | 8  | 3.48E-104 | 77 |
| HBM_contig265284_s117727c3_gene4   | 6  | 7.87E-61  | 77 |
| HBM_contig1038212_s365857c9_gene1  | 3  | 1.41E-32  | 76 |
| HBM_contig274496_s121527c2_gene1   | 2  | 3.50E-53  | 76 |
| HBM_contig30266_s12350c4_gene1     | 7  | 1.66E-70  | 76 |
| HBM_contig355900_s157502c9_gene1   | 2  | 1.26E-53  | 76 |
| HBM_contig1302222_s414481c14_gene1 | 2  | 6.06E-53  | 75 |
| HBM_contig433979_s198650c9_gene1   | 4  | 3.18E-51  | 75 |
| HBM_contig1289974_s410033c6_gene1  | 7  | 3.90E-61  | 74 |
| HBM_contig1318907_s424517c3_gene1  | 13 | 1.30E-54  | 74 |
| HBM_contig332409_s146322c14_gene1  | 3  | 3.50E-07  | 74 |
| HBM_contig1295671_s411600c1_gene1  | 5  | 7.97E-38  | 73 |
| HBM_contig264692_s117484c7_gene1   | 4  | 1.58E-38  | 73 |
| HBM_contig290987_s127806c1_gene1   | 5  | 7.29E-73  | 73 |
| HBM_contig393998_s177156c10_gene1  | 12 | 1.89E-74  | 73 |
| HBM_contig420863_s191570c9_gene1   | 11 | 4.77E-50  | 73 |
| HBM_contig1317309_s423378c2_gene1  | 5  | 3.38E-95  | 72 |
| HBM_contig414079_s187868_gene1     | 13 | 1.14E-81  | 72 |
| HBM_contig513220_s239591c6_gene3   | 4  | 1.41E-90  | 72 |
| HBM_contig657916_s279871c2_gene2   | 8  | 5.12E-86  | 72 |
| HBM_contig232787_s103605c15_gene1  | 15 | 2.81E-62  | 71 |
| HBM_contig1288687_s409803c1_gene1  | 4  | 3.57E-64  | 70 |
| HBM_contig1300792_s413756c8_gene1  | 4  | 1.56E-38  | 70 |
| HBM_contig227302_s101115c1_gene1   | 3  | 7.09E-48  | 70 |
| HBM_contig329252_s144873c5_gene3   | 3  | 5.29E-85  | 70 |
| HBM_contig366145_s162700_gene1     | 4  | 9.31E-68  | 70 |
| HBM_contig397018_s178729c12_gene1  | 3  | 3.88E-13  | 70 |
| HBM_contig757308_s300336c4_gene2   | 8  | 3.82E-72  | 70 |
| HBM_contig1294277_s411129_gene1    | 4  | 3.20E-29  | 69 |
| HBM_contig1294848_s411334c2_gene2  | 7  | 1.46E-49  | 69 |
| HBM_contig1311115_s419277c5_gene1  | 16 | 1.93E-37  | 69 |
| HBM_contig1323470_s427819c4_gene1  | 10 | 3.58E-91  | 69 |
| HBM_contig1348382_s448422c18_gene1 | 1  | 1.84E-84  | 69 |
| HBM_contig1357953_s456977c1_gene1  | 3  | 1.64E-79  | 69 |
| HBM_contig309950_s135961c7_gene1   | 4  | 1.68E-83  | 69 |
| HBM_contig362882_s161039c4_gene3   | 33 | 3.01E-30  | 69 |
| HBM_contig281039_s124058c4_gene1   | 2  | 1.44E-28  | 68 |
| HBM_contig395231_s177780c5_gene1   | 3  | 2.68E-88  | 68 |
| HBM_contig654533_s279397c2_gene1   | 8  | 2.04E-65  | 68 |

|                                    |    |          |    |
|------------------------------------|----|----------|----|
| HBM_contig09843_s04035c2_gene1     | 4  | 5.80E-73 | 67 |
| HBM_contig1026725_s363504c2_gene2  | 5  | 8.11E-65 | 67 |
| HBM_contig1308223_s417615c21_gene1 | 3  | 5.26E-69 | 67 |
| HBM_contig1324950_s428974c9_gene1  | 38 | 2.67E-86 | 67 |
| HBM_contig1332985_s435332c13_gene1 | 3  | 1.57E-90 | 67 |
| HBM_contig306687_s134504c10_gene1  | 5  | 1.38E-41 | 67 |
| HBM_contig332061_s146156c4_gene2   | 7  | 8.04E-72 | 67 |
| HBM_contig363653_s161426_gene1     | 6  | 3.47E-28 | 67 |
| HBM_contig550434_s255571_gene1     | 13 | 2.98E-25 | 67 |
| HBM_contig1345306_s445741c4_gene1  | 32 | 1.01E-76 | 66 |
| HBM_contig1351062_s450759c14_gene1 | 10 | 1.95E-09 | 66 |
| HBM_contig273515_s121147c18_gene2  | 7  | 2.38E-91 | 66 |
| HBM_contig335154_s147607c4_gene1   | 5  | 1.60E-42 | 66 |
| HBM_contig1289509_s409944c2_gene1  | 32 | 3.70E-74 | 65 |
| HBM_contig1305977_s416315c19_gene1 | 4  | 1.58E-62 | 65 |
| HBM_contig299515_s131427c8_gene1   | 5  | 3.92E-80 | 64 |
| HBM_contig332846_s146521c1_gene1   | 5  | 3.84E-70 | 64 |
| HBM_contig396545_s178492_gene1     | 12 | 2.32E-88 | 64 |
| HBM_contig1030688_s364424c3_gene1  | 6  | 2.80E-75 | 63 |
| HBM_contig1119081_s384118c2_gene1  | 5  | 7.00E-76 | 63 |
| HBM_contig276796_s122460c2_gene1   | 5  | 2.19E-81 | 63 |
| HBM_contig919895_s338071c2_gene1   | 5  | 7.52E-44 | 63 |
| HBM_contig369602_s164404_gene1     | 3  | 7.71E-14 | 62 |
| HBM_contig1329326_s432359c2_gene3  | 9  | 2.21E-62 | 61 |
| HBM_contig246731_s109760c5_gene1   | 5  | 2.11E-48 | 61 |
| HBM_contig325046_s142945_gene1     | 5  | 3.10E-56 | 61 |
| HBM_contig47165_s19567c3_gene2     | 7  | 1.13E-55 | 61 |
| HBM_contig1303515_s415144c5_gene1  | 8  | 1.12E-79 | 60 |
| HBM_contig1352860_s452368_gene1    | 15 | 6.45E-15 | 60 |
| HBM_contig379006_s169268c4_gene1   | 15 | 1.48E-61 | 60 |
| HBM_contig383462_s171609c3_gene1   | 11 | 2.71E-72 | 60 |
| HBM_contig1308208_s417615c6_gene1  | 13 | 4.54E-10 | 59 |
| HBM_contig272314_s120676_gene1     | 8  | 8.30E-23 | 59 |
| HBM_contig325083_s142963_gene1     | 2  | 6.21E-65 | 59 |
| HBM_contig332408_s146322c13_gene1  | 8  | 1.76E-42 | 59 |
| HBM_contig1289286_s409907c6_gene1  | 10 | 9.39E-48 | 58 |
| HBM_contig232867_s103635c14_gene1  | 32 | 3.83E-65 | 58 |
| HBM_contig253780_s112770c3_gene1   | 3  | 1.78E-17 | 58 |
| HBM_contig364556_s161856_gene1     | 10 | 3.95E-56 | 58 |
| HBM_contig369354_s164271_gene1     | 5  | 1.80E-32 | 58 |
| HBM_contig446109_s205232c1_gene1   | 7  | 1.22E-69 | 58 |
| HBM_contig878396_gene1             | 9  | 9.53E-12 | 58 |
| HBM_contig1030687_s364424c2_gene1  | 5  | 5.68E-13 | 57 |
| HBM_contig246314_s109563_gene1     | 12 | 1.50E-17 | 57 |
| HBM_contig285737_s125861c3_gene1   | 8  | 6.96E-37 | 57 |
| HBM_contig324592_s142744_gene1     | 3  | 5.30E-29 | 57 |

|                                    |    |          |    |
|------------------------------------|----|----------|----|
| HBM_contig368493_s163834c3_gene1   | 5  | 2.31E-65 | 57 |
| HBM_contig379004_s169268c2_gene1   | 7  | 6.53E-56 | 57 |
| HBM_contig395725_s178055_gene1     | 3  | 1.38E-09 | 57 |
| HBM_contig819355_s316235_gene1     | 25 | 1.89E-59 | 57 |
| HBM_contig286418_s126148c2_gene1   | 12 | 3.38E-35 | 56 |
| HBM_contig336329_s148152c12_gene1  | 32 | 1.07E-70 | 56 |
| HBM_contig422634_s192523c3_gene1   | 8  | 4.66E-47 | 56 |
| HBM_contig1292487_s410603c7_gene1  | 11 | 6.86E-41 | 55 |
| HBM_contig253707_s112736c8_gene1   | 12 | 9.16E-69 | 55 |
| HBM_contig331923_s146093c5_gene1   | 12 | 1.48E-48 | 55 |
| HBM_contig348258_s153791c20_gene1  | 5  | 1.32E-20 | 55 |
| HBM_contig383816_s171800_gene1     | 8  | 6.39E-51 | 55 |
| HBM_contig979245_s352662c2_gene3   | 3  | 2.90E-20 | 55 |
| HBM_contig205504_s91271c2_gene1    | 10 | 1.70E-66 | 54 |
| HBM_contig391064_s175615c5_gene1   | 4  | 1.40E-42 | 54 |
| HBM_contig1314787_s421584c1_gene1  | 11 | 3.93E-19 | 53 |
| HBM_contig1323260_s427655_gene1    | 7  | 4.52E-65 | 53 |
| HBM_contig1352352_s451908c3_gene2  | 9  | 5.74E-49 | 53 |
| HBM_contig289068_s127107_gene1     | 13 | 2.44E-15 | 53 |
| HBM_contig313150_s137410c19_gene1  | 3  | 1.80E-33 | 53 |
| HBM_contig331921_s146093c3_gene1   | 9  | 2.31E-20 | 53 |
| HBM_contig331924_s146093c6_gene1   | 10 | 1.65E-22 | 53 |
| HBM_contig331929_s146093c11_gene1  | 14 | 1.74E-21 | 53 |
| HBM_contig429984_s196523_gene1     | 11 | 7.07E-65 | 53 |
| HBM_contig757629_s300436c6_gene1   | 5  | 1.48E-08 | 53 |
| HBM_contig1022739_s362558c6_gene2  | 12 | 8.39E-37 | 52 |
| HBM_contig343186_s151438c8_gene1   | 10 | 2.09E-55 | 52 |
| HBM_contig134158_s58687c27_gene1   | 6  | 1.10E-38 | 51 |
| HBM_contig1357958_s456977c6_gene3  | 4  | 7.03E-59 | 51 |
| HBM_contig22381_s09035c12_gene1    | 2  | 1.50E-39 | 51 |
| HBM_contig1314789_s421584c3_gene1  | 10 | 9.51E-24 | 50 |
| HBM_contig1356982_s456101_gene1    | 7  | 7.60E-12 | 50 |
| HBM_contig230057_s102351c21_gene1  | 4  | 7.89E-50 | 50 |
| HBM_contig336327_s148152c10_gene1  | 7  | 6.58E-06 | 50 |
| HBM_contig348246_s153791c8_gene1   | 5  | 6.54E-48 | 49 |
| HBM_contig526985_s245906c4_gene1   | 10 | 3.28E-44 | 49 |
| HBM_contig1322037_s426750c3_gene1  | 9  | 2.23E-35 | 48 |
| HBM_contig1445641_s541695c60_gene1 | 13 | 1.13E-28 | 48 |
| HBM_contig325647_s143203_gene1     | 10 | 3.19E-55 | 48 |
| HBM_contig336323_s148152c6_gene1   | 15 | 8.39E-33 | 48 |
| HBM_contig408839_s185016_gene1     | 13 | 3.68E-07 | 48 |
| HBM_contig431766_s197470c4_gene1   | 8  | 2.73E-37 | 48 |
| HBM_contig1016681_s361260c5_gene1  | 5  | 6.90E-38 | 47 |
| HBM_contig1494088_s582224c2_gene2  | 4  | 4.49E-28 | 47 |
| HBM_contig771203_s304239c15_gene1  | 3  | 5.61E-08 | 47 |
| HBM_contig1109905_s381969_gene1    | 7  | 2.84E-17 | 45 |

|                                    |    |          |    |
|------------------------------------|----|----------|----|
| HBM_contig1348390_s448422c26_gene1 | 3  | 4.27E-25 | 45 |
| HBM_contig331920_s146093c2_gene1   | 22 | 9.62E-30 | 45 |
| HBM_contig355008_s157135c8_gene1   | 4  | 9.30E-36 | 45 |
| HBM_contig1314791_s421584c5_gene1  | 12 | 2.24E-35 | 44 |
| HBM_contig1409221_s506095c5_gene3  | 2  | 5.04E-39 | 44 |
| HBM_contig164849_s72856c4_gene2    | 4  | 7.03E-20 | 44 |
| HBM_contig1409222_s506095c6_gene1  | 2  | 1.05E-33 | 43 |
| HBM_contig314926_s138259_gene1     | 12 | 1.29E-35 | 43 |
| HBM_contig1291168_s410297_gene2    | 9  | 1.43E-34 | 42 |
| HBM_contig446110_s205232c2_gene1   | 7  | 6.70E-08 | 42 |
| HBM_contig323185_s142103c31_gene1  | 4  | 1.69E-23 | 40 |
| HBM_contig1119082_s384118c3_gene1  | 1  | 4.23E-26 | 37 |
| HBM_contig1289127_s409874c9_gene1  | 1  | 1.50E-38 | 36 |
| HBM_contig1288955_s409848c4_gene1  | 2  | 7.10E-06 | 35 |
| HBM_contig1311113_s419277c3_gene1  | 6  | 5.30E-09 | 35 |
| HBM_contig403677_s182258c2_gene1   | 3  | 2.00E-07 | 34 |
| HBM_contig1289511_s409944c4_gene3  | 3  | 1.15E-07 | 33 |
| HBM_contig1318935_s424517c31_gene1 | 3  | 7.59E-18 | 32 |
| HBM_contig371632_s165417c5_gene1   | 4  | 5.42E-08 | 29 |
| HBM_contig1420163_s516850c9_gene1  | 1  | 1.88E-08 | 26 |
| HBM_contig353116_s156220_gene1     | 2  | 2.09E-07 | 26 |
| HBM_contig451554_s208132c13_gene1  | 1  | 9.18E-06 | 26 |

<sup>a</sup>TBLASTN hits with E-value < 10<sup>-5</sup>

<sup>b</sup>In cases where multiple hits occur, the reported value is for the top hit

**Table S18.** Lignocellulose biosynthetic genes of *H. brasiliensis* in comparison to other sequenced genomes

|                                          | <i>Hevea</i> | <i>Ricinus</i> | <i>Populus</i> | <i>Arabidopsis</i> | <i>Oryza</i> | <i>Selaginella</i> |
|------------------------------------------|--------------|----------------|----------------|--------------------|--------------|--------------------|
| <b>Lignin synthesis related genes</b>    |              |                |                |                    |              |                    |
| PAL                                      | 4            | 4              | 5              | 4                  | 6            | 1                  |
| C4H                                      | 7            | 1              | 2              | 1                  | 2            | -                  |
| 4CL                                      | 4            | 3              | 3              | 4                  | 5            | 2                  |
| HCT                                      | 6            | 1              | 1              | 1                  | 2            | 3                  |
| COMT                                     | 10           | 46             | 41             | 17                 | 49           | 17                 |
| C3H                                      | 6            | 2              | 3              | 1                  | 2            | -                  |
| CCoAOMT                                  | 3            | 3              | 2              | 1                  | 1            | 2                  |
| CCR                                      | 3            |                | 3              | 2                  | 3            |                    |
| F5H                                      | 2            | 1              | 3              | 1                  | 1            | -                  |
| CAD                                      | 5            | 10             | 24             | 9                  | 20           | 9                  |
| <b>Cellulose synthesis related genes</b> |              |                |                |                    |              |                    |
| CesA                                     | 36           | 13             | 28             | 10                 | 20           | 6                  |
| COBRA                                    | 10           | 6              | 4              | 1                  | 9            | 2                  |
| SuSy                                     | 8            | 5              | 7              | 6                  | 5            | -                  |
| FRA2                                     | 4            | 1              | 2              | 1                  | 1            | 1                  |
| KOR                                      | 7            | 3              | 4              | 3                  | 3            | 1                  |
| $\alpha$ -L-fucosidases                  | 12           | 23             | 38             | 25                 | 67           | 45                 |

**Table S19.** Putative NBS-coding R genes of *H. brasiliensis* in comparison to other sequenced genomes

| <b>Predicted Protein</b>   | <i>Hevea</i> | <i>Populus</i> | <i>Papaya</i> | <i>Arabidopsis</i> | <i>Oryza</i> |
|----------------------------|--------------|----------------|---------------|--------------------|--------------|
| <b><i>Without LRRs</i></b> |              |                |               |                    |              |
| TIR-NBS                    | 17           | 10             | 2             | 21                 | 3            |
| CC-NBS                     | 134          | 19             | 2             | 5                  | 7            |
| NBS                        | 350          | 49             | 17            | 1                  | 45           |
| <b><i>With LRRs</i></b>    |              |                |               |                    |              |
| TIR-NBS-LRR                | 25           | 64             | 6             | 93                 | 0            |
| CC-NBS-LRR                 | 45           | 119            | 4             | 51                 | 160          |
| NBS-LRR                    | 47           | 90             | 23            | 3                  | 304          |
| <b>Total</b>               | <b>618</b>   | <b>351</b>     | <b>54</b>     | <b>174</b>         | <b>519</b>   |

**Table S20.** Pathogenesis-related proteins of *H. brasiliensis* in comparison with other genomes

| <b>Pathogenesis-Related Proteins (PRs)</b> | <i>Hevea</i> | <i>Ricinus</i> | <i>Populus</i> | <i>Arabidopsis</i> | <i>Oryza</i> | <i>Selaginella</i> |
|--------------------------------------------|--------------|----------------|----------------|--------------------|--------------|--------------------|
| Pr1                                        | 12           | 7              | 16             | 10                 | 10           | 3                  |
| Pr2                                        | 22           | 61             | 125            | 95                 | 96           | 60                 |
| Pr3                                        | 7            | 9              | 23             | 14                 | 19           | 23                 |
| Pr4                                        | 27           | 3              | 8              | 1                  | 5            | 1                  |
| Pr5                                        | 17           | 26             | 42             | 22                 | 40           | 18                 |
| Pr6                                        | 5            | 4              | 20             | 6                  | -            | -                  |
| Pr8                                        | 14           | 8              | 14             | 1                  | 31           | 8                  |
| Pr10                                       | 11           | 38             | 34             | 26                 | 2            | 5                  |
| Lectins                                    | 32           | 48             | 64             | 102                | 127          | 16                 |
| <b>Total</b>                               | <b>147</b>   | <b>204</b>     | <b>346</b>     | <b>277</b>         | <b>330</b>   | <b>134</b>         |

**Table S21.** Systemic acquired resistance (SAR) and hypersensitive response (HR) related genes found in the *H. brasiliensis* genome

| Gene Model                         | Gene name                                        |
|------------------------------------|--------------------------------------------------|
| HBM_contig06421_s02656c2_gene2     | Metallothionein                                  |
| HBM_contig1037845_s365794c13_gene3 | Non race-specific disease resistance 1           |
| HBM_contig105575_s45633c21_gene1   | F-box protein                                    |
| HBM_contig1074434_s372022c6_gene1  | Serine-threonine protein kinase                  |
| HBM_contig117141_s50884c14_gene1   | Ethylene insensitive 3-like protein              |
| HBM_contig1288682_s409802c24_gene1 | Bromodomain-containing protein                   |
| HBM_contig1288976_s409852c2_gene2  | Glycerol kinase                                  |
| HBM_contig1289068_s409864c2_gene2  | WRKY-like transcription                          |
| HBM_contig1289631_s409964c4_gene2  | Alternative oxidase 2                            |
| HBM_contig1290638_s410161c14_gene1 | Xanthine dehydrogenase 1                         |
| HBM_contig1291402_s410361c4_gene2  | Serine/threonine protein kinase PSB1             |
| HBM_contig1291889_s410454c6_gene1  | Monoxygenase                                     |
| HBM_contig1292364_s410573c2_gene1  | Oxalate oxidase                                  |
| HBM_contig1292450_s410594c2_gene1  | Zinc finger protein                              |
| HBM_contig1292626_s410633c16_gene1 | Lipoxygenase                                     |
| HBM_contig1295205_s411448c4_gene2  | Skp1-Cullin-F-box protein                        |
| HBM_contig1295495_s411532c6_gene1  | Protein 5'->3' exoribonuclease, AIN1             |
| HBM_contig1295989_s411738c1_gene1  | Peroxidase 17                                    |
| HBM_contig1296639_s411971c1_gene1  | Early ethylene-responsive genes                  |
| HBM_contig1296662_s411975c11_gene2 | Acyl-protein thioesterase                        |
| HBM_contig1296871_s412049c3_gene1  | Omega-3 fatty acid desaturase, FAD8              |
| HBM_contig1298013_s412552c3_gene1  | Ethylene response sensor 2                       |
| HBM_contig1300802_s413756c18_gene1 | Mitogen-activated protein kinase kinase kinase 2 |
| HBM_contig1304427_s415555c19_gene4 | Isochorismate synthase 1                         |
| HBM_contig1304763_s415719c13_gene1 | Omega-3 fatty acid desaturase                    |
| HBM_contig1307472_s417170c13_gene1 | Dimethylaniline monooxygenase                    |
| HBM_contig1308601_s417813c25_gene1 | Serine/threonine-protein kinase CTR1             |
| HBM_contig1315631_s422196c17_gene1 | Mitogen activated protein1                       |
| HBM_contig1324775_s428843c2_gene1  | Allene oxide synthase                            |
| HBM_contig1325708_s429519c25_gene2 | Calmodulin-binding heat-shock protein,           |
| HBM_contig1327523_s430947c6_gene1  | Regulatory protein NPR1                          |
| HBM_contig1328657_s431840c3_gene3  | Wall-associated receptor kinase 2                |
| HBM_contig1333064_s435374c4_gene1  | Enhanced disease susceptibility 1                |
| HBM_contig1340690_s441737c6_gene1  | DNA binding protein GT-1                         |
| HBM_contig1341105_s442084c7_gene1  | Beta glucosidase                                 |
| HBM_contig1342092_s442954c9_gene2  | Phospholipase                                    |
| HBM_contig1345388_s445788c3_gene1  | Zeaxanthin epoxidase (1.14.13.90)                |
| HBM_contig1347991_s448099c5_gene1  | Hydroxynitrile lyase                             |
| HBM_contig1422110_s518739c4_gene1  | Serine/threonine protein kinase                  |
| HBM_contig1465004_s559611c14_gene2 | Pectate lyase                                    |
| HBM_contig173710_s76922c5_gene1    | CCoAMT; caffeoyl-CoA O-methyltransferase         |
| HBM_contig17421_s07081c9_gene1     | Heat shock protein                               |

|                                   |                                                            |
|-----------------------------------|------------------------------------------------------------|
| HBM_contig188767_s83719c8_gene1   | cytochrome P450 probable ent-kaurenoic acid oxidase        |
| HBM_contig200851_s89231c10_gene1  | Receptor protein kinase                                    |
| HBM_contig226693_s100838c4_gene1  | Serine/threonine phosphatase                               |
| HBM_contig228172_s101510c3_gene3  | Brassinosteroid insensitive 1                              |
| HBM_contig238412_s106118_gene1    | Eukaryotic translation initiation factor 2c                |
| HBM_contig242210_s107817c13_gene1 | Glutathione peroxidase                                     |
| HBM_contig252939_s112426c6_gene2  | Zeamatin precursor                                         |
| HBM_contig262953_s116732c1_gene1  | Mitogen-activated protein kinase 2                         |
| HBM_contig263035_s116770c1_gene1  | Flavine-containing monooxygenase                           |
| HBM_contig264998_s117599_gene1    | Rhcadhesin receptor precursor                              |
| HBM_contig265562_s117837_gene1    | Coronatine-insensitive 1                                   |
| HBM_contig274137_s121393c1_gene1  | Leucine-rich repeat-containing protein                     |
| HBM_contig274142_s121393c6_gene1  | OUT domain protein                                         |
| HBM_contig283262_s124944c9_gene1  | Brassinosteroid insensitive 1 associated receptor kinase 1 |
| HBM_contig285476_s125769c6_gene1  | Ethylene receptor 2                                        |
| HBM_contig296913_s130307_gene1    | Ethylene-responsive transcription factor                   |
| HBM_contig315927_s138736c1_gene1  | Pathogenesis-related protein 1                             |
| HBM_contig322575_s141866c13_gene1 | Mitogen activated kinase-like protein                      |
| HBM_contig322635_s141887c15_gene2 | Sphingoid base Hydroxylase 1                               |
| HBM_contig329111_s144804_gene1    | Nucleoporin                                                |
| HBM_contig333187_s146668c1_gene1  | Disease resistance protein                                 |
| HBM_contig339286_s149545c5_gene1  | Latex beta-cyanoalanine synthase                           |
| HBM_contig341044_s150417c9_gene4  | 2-nitropropane dioxygenase family                          |
| HBM_contig346636_s153048c2_gene1  | Map3k delta-1 protein kinase                               |
| HBM_contig349742_s154477c6_gene1  | Disease resistance protein 2                               |
| HBM_contig351365_s155313c3_gene2  | Poly(rC)-binding protein                                   |
| HBM_contig369959_s164591c6_gene1  | ethylene-responsive element binding factor 5               |
| HBM_contig39977_s16454c9_gene1    | Transcription factor HBP-1b                                |
| HBM_contig406858_s183928c16_gene1 | APX1 (ascorbate peroxidase 1)                              |
| HBM_contig406860_s183928c18_gene1 | Mitogen-activated protein kinase                           |
| HBM_contig409421_s185323_gene1    | WRKY transcription factor, putative                        |
| HBM_contig423248_s192871c2_gene2  | Calmodulin                                                 |
| HBM_contig423596_s193057c15_gene1 | Ubiquitin ligase                                           |
| HBM_contig427107_s194975c3_gene1  | Mitogen-activated protein kinase kinase                    |
| HBM_contig442498_s203277c4_gene1  | Stearoyl-acyl-carrier protein desaturase                   |
| HBM_contig455602_s210290c11_gene1 | Ethylene receptor 1                                        |
| HBM_contig469575_s217788c5_gene2  | Phytoalexin deficient4                                     |
| HBM_contig483419_s224948c2_gene1  | Disease resistance protein 8                               |
| HBM_contig494277_s230381c9_gene2  | GH3 family protein                                         |
| HBM_contig509911_s237995c8_gene1  | Copine                                                     |
| HBM_contig523425_s244330_gene1    | Transcription factor MYC2                                  |
| HBM_contig536436_s250034c21_gene1 | Jasmonate-insensitive 3                                    |
| HBM_contig549096_s255049c1_gene2  | DNA-damage-inducible protein                               |
| HBM_contig644472_s277880c1_gene1  | Mitogen-activated protein kinase kinase kinase1            |
| HBM_contig701896_s287934c9_gene1  | Ein3-binding f-box protein 3                               |
| HBM_contig732471_s294373c14_gene3 | Ethylene- insensitive 4                                    |

|                                   |                                                   |
|-----------------------------------|---------------------------------------------------|
| HBM_contig73508_s31074c6_gene1    | Gamma-glutamylcysteine synthetase                 |
| HBM_contig735668_s295000c2_gene1  | Catalytic/ glucuronoxylan glucuronosyltransferase |
| HBM_contig764172_s302159c11_gene1 | Mitogen-activated protein kinase kinase 2         |
| HBM_contig764172_s302159c11_gene2 | protein phosphatase 2C                            |
| HBM_contig821365_s316780c31_gene1 | Ethylene-insensitive protein 2                    |
| HBM_contig829332_s318669c4_gene1  | ABL Interactor-Like Protein 2                     |
| HBM_contig863487_s324777c6_gene2  | S-phase kinase-associated protein 1               |
| HBM_contig958308_s346865c1_gene1  | Phospholipase d beta                              |

---

**Table S22.** Latex allergens in the *H. brasiliensis* genome

| <b>Allergen type</b>             | <b>Names and contig number</b>          |
|----------------------------------|-----------------------------------------|
| <b>Hevb 1</b>                    | <b>Rubber elongation factor (REF)</b>   |
|                                  | HBM_contig1314787_s421584c1_gene1       |
|                                  | HBM_contig1314789_s421584c3_gene1       |
|                                  | HBM_contig1352860_s452368_gene1         |
|                                  | HBM_contig1432969_s529413_gene1         |
|                                  | HBM_contig210302_s93430_gene1           |
|                                  | HBM_contig246314_s109563_gene1          |
|                                  | HBM_contig285004_s125605_gene1          |
|                                  | HBM_contig289068_s127107_gene1          |
|                                  | HBM_contig331924_s146093c6_gene1        |
|                                  | HBM_contig331929_s146093c11_gene1       |
|                                  | HBM_contig420863_s191570c9_gene1        |
|                                  | HBM_contig953976_gene1                  |
| <b>Hevb 2</b>                    | <b><math>\beta</math>-1,3-glucanase</b> |
|                                  | HBM_contig1053939_gene1                 |
|                                  | HBM_contig1288699_s409805c4_gene6       |
|                                  | HBM_contig1288700_s409805c5_gene2       |
|                                  | HBM_contig1331601_s434259_gene1         |
|                                  | HBM_contig1383052_s480661_gene1         |
|                                  | HBM_contig1383052_s480661_gene2         |
|                                  | HBM_contig1493847_gene1                 |
|                                  | HBM_contig1542420_gene1                 |
|                                  | HBM_contig181937_s80601_gene1           |
|                                  | HBM_contig484011_s225263c1_gene1        |
| HBM_contig49288_s20505_gene1     |                                         |
| <b>Hevb 3</b>                    | <b>Small rubber particle</b>            |
|                                  | HBM_contig1291168_s410297_gene2         |
|                                  | HBM_contig1314791_s421584c5_gene1       |
|                                  | HBM_contig1351062_s450759c14_gene1      |
|                                  | HBM_contig1445641_s541695c60_gene1      |
|                                  | HBM_contig878396_gene1                  |
|                                  | HBM_contig364556_s161856_gene1          |
|                                  | HBM_contig331921_s146093c3_gene1        |
|                                  | HBM_contig331923_s146093c5_gene1        |
| HBM_contig314926_s138259_gene1   |                                         |
| HBM_contig331920_s146093c2_gene1 |                                         |
| <b>Hevb 4</b>                    | <b>Lecithinase homolog</b>              |
|                                  | HBM_contig367975_s163585_gene1          |
|                                  | HBM_contig1311038_s419233c1_gene1       |
|                                  | HBM_contig1302448_s414608_gene1         |
|                                  | HBM_contig128030_s55849c2_gene1         |
| HBM_contig128029_s55849c1_gene1  |                                         |

|                |                                                                                                                                                                                                                                                                                                                                                                                                                                                                                                                                                                             |
|----------------|-----------------------------------------------------------------------------------------------------------------------------------------------------------------------------------------------------------------------------------------------------------------------------------------------------------------------------------------------------------------------------------------------------------------------------------------------------------------------------------------------------------------------------------------------------------------------------|
| <b>Hevb 5</b>  | <b>Latex major allergen</b><br>HBM_contig279320_s123416c2_gene1                                                                                                                                                                                                                                                                                                                                                                                                                                                                                                             |
| <b>Hevb 6</b>  | <b>Hevein</b><br>HBM_contig1099636_s379205_gene1<br>HBM_contig1326398_s430072_gene1<br>HBM_contig1332655_s435061c1_gene1<br>HBM_contig1404480_s501478_gene1<br>HBM_contig1438942_s535269_gene1<br>HBM_contig1463769_s558530_gene1<br>HBM_contig1485741_s576443_gene1<br>HBM_contig1487445_s577627_gene1<br>HBM_contig1511743_gene1<br>HBM_contig1523411_s597290_gene1<br>HBM_contig1544593_s603451_gene1<br>HBM_contig1551202_s604715_gene1<br>HBM_contig1580472_gene1<br>HBM_contig293053_s128596c1_gene1<br>HBM_contig36291_gene1coding<br>HBM_contig795181_s310723_gene1 |
| <b>Hevb 7</b>  | <b>Patatin-like</b><br>HBM_contig274460_s121513c2_gene1<br>HBM_contig269214_s119330c6_gene1<br>HBM_contig604530_s271122c2_gene1<br>HBM_contig1301350_s414027c3_gene2<br>HBM_contig1301351_s414027c4_gene1                                                                                                                                                                                                                                                                                                                                                                   |
| <b>Hevb 8</b>  | <b>Profilin</b><br>HBM_contig415131_s188411_gene1<br>HBM_contig1330838_s433634_gene1<br>HBM_contig367050_s163105c2_gene1<br>HBM_contig1164698_s393417c31_gene3<br>HBM_contig1074430_s372022c2_gene1<br>HBM_contig1329259_s432305_gene1                                                                                                                                                                                                                                                                                                                                      |
| <b>Hevb 9</b>  | <b>Enolase</b><br>HBM_contig260697_s115748c12_gene<br>HBM_contig295239_s129579c5_gene1<br>HBM_contig319636_s140387c5_gene1<br>HBM_contig383573_s171660c8_gene1                                                                                                                                                                                                                                                                                                                                                                                                              |
| <b>Hevb 10</b> | <b>Superoxide dismutase (Mn)</b><br>HBM_contig1380717_s478448c12_gene1<br>HBM_contig1299900_s413337c4_gene3                                                                                                                                                                                                                                                                                                                                                                                                                                                                 |
| <b>Hevb 11</b> | <b>Chitinase</b><br>HBM_contig1331506_s434174c2_gene1<br>HBM_contig1374580_s472577_gene1<br>HBM_contig1434962_s531376_gene1<br>HBM_contig376395_s167879c1_gene1<br>HBM_contig380563_s170073_gene1                                                                                                                                                                                                                                                                                                                                                                           |

|                |                                   |
|----------------|-----------------------------------|
|                | HBM_contig412336_s186887c8_gene1  |
|                | HBM_contig594755_gene1            |
|                | HBM_contig782692_s307260_gene1    |
|                | HBM_contig951921_s344934c1_gene1  |
|                | HBM_contig952555_gene1            |
|                | HBM_contig980709_s353149_gene1    |
| <b>Hevb 12</b> | <b>Lipid transfer precursor</b>   |
|                | HBM_contig323161_s142103c7_gene3  |
|                | HBM_contig349554_s154385c1_gene1  |
| <b>Hevb 13</b> | <b>Esterase</b>                   |
|                | HBM_contig371165_s165162c13_gene1 |
|                | HBM_contig371163_s165162c11_gene3 |
|                | HBM_contig1317196_s423303_gene1   |
|                | HBM_contig134028_s58638_gene1     |
|                | HBM_contig899653_s333225_gene1    |
|                | HBM_contig371167_s165162c15_gene1 |
|                | HBM_contig370747_s164953c24_gene1 |
|                | HBM_contig371169_s165162c17_gene1 |
|                | HBM_contig464308_s214932_gene1    |
| <b>Hevb 14</b> | <b>Hevamine</b>                   |
|                | HBM_contig1389101_s486528c4_gene1 |
|                | HBM_contig1371073_s469275_gene1   |
|                | HBM_contig1344950_s445443c5_gene6 |
|                | HBM_contig1321967_s426707c2_gene2 |
|                | HBM_contig1310281_s418802c6_gene1 |
|                | HBM_contig1303495_s415132_gene1   |

**Table S23.** Non-latex allergens in the *H. brasiliensis* genome

| <b>Non-latex allergen</b> | <b>Gene model</b>                  |
|---------------------------|------------------------------------|
| Pollen allergen           | HBM_contig623408_s274630c9_gene1   |
|                           | HBM_contig1074430_s372022c2_gene2  |
| $\alpha$ -expansin        | HBM_contig289660_s127337c2_gene1   |
|                           | HBM_contig311528_s136675c1_gene1   |
|                           | HBM_contig1291975_s410466c42_gene1 |
|                           | HBM_contig1369889_s468147_gene1    |
|                           | HBM_contig302755_s132887_gene1     |
|                           | HBM_contig350467_s154865_gene1     |
|                           | HBM_contig350403_s154837_gene1     |
|                           | HBM_contig446231_s205297_gene1     |
| $\beta$ -expansin         | HBM_contig903040_s334087c9_gene1   |
|                           | HBM_contig818284_s315950c3_gene1   |
| Isoflavone reductase      | HBM_contig334692_s147398c6_gene1   |
|                           | HBM_contig252987_s112426c54_gene1  |
|                           | HBM_contig1305222_s415946c2_gene1  |
|                           | HBM_contig212170_s94313_gene1      |

**Table S24.** Transcription factors present in *H. brasiliensis* in comparison to other sequenced plant genomes

| <b>Transcription Factors</b> | <i>Hevea</i> | <i>Ricinus</i> | <i>Populus</i> | <i>Arabidopsis</i> | <i>Oryza</i> | <i>Selaginella</i> |
|------------------------------|--------------|----------------|----------------|--------------------|--------------|--------------------|
| bHLH                         | 752          | 121            | 226            | 194                | 178          | 85                 |
| MYB                          | 570          | 63             | 212            | 159                | 124          | 41                 |
| C3H                          | 470          | 36             | 69             | 56                 | 50           | 36                 |
| G2-like                      | 461          | 33             | 74             | 55                 | 56           | 32                 |
| WRKY                         | 445          | 60             | 119            | 89                 | 116          | 25                 |
| MYB_related                  | 397          | 99             | 104            | 85                 | 94           | 63                 |
| NAC                          | 336          | 97             | 182            | 135                | 166          | 38                 |
| ERF                          | 246          | 94             | 176            | 132                | 143          | 68                 |
| HD-ZIP                       | 182          | 31             | 67             | 56                 | 46           | 14                 |
| C2H2                         | 164          | 69             | 115            | 104                | 91           | 44                 |
| AP2                          | 139          | 18             | 30             | 25                 | 27           | 16                 |
| TALE                         | 139          | 16             | 35             | 23                 | 28           | 5                  |
| HSF                          | 136          | 19             | 32             | 27                 | 44           | 14                 |
| B3                           | 122          | 41             | 116            | 71                 | 55           | 24                 |
| ARR-B                        | 116          | 11             | 21             | 16                 | 9            | 9                  |
| MADS-box                     | 112          | 50             | 116            | 156                | 108          | 20                 |
| NF-YB                        | 106          | 14             | 22             | 19                 | 14           | 9                  |
| GATA                         | 97           | 19             | 46             | 31                 | 32           | 11                 |
| GRAS                         | 96           | 48             | 114            | 36                 | 77           | 89                 |
| SBP                          | 88           | 15             | 32             | 18                 | 20           | 16                 |
| WOX                          | 78           | 11             | 20             | 17                 | 12           | 13                 |
| LBD                          | 63           | 34             | 59             | 43                 | 42           | 21                 |
| CO-like                      | 62           | 9              | 16             | 19                 | 11           | 7                  |
| ZF-HD                        | 62           | 11             | 24             | 17                 | 15           | 15                 |
| YABBY                        | 58           | 6              | 13             | 8                  | 15           | 1                  |
| ARF                          | 56           | 17             | 53             | 35                 | 34           | 29                 |
| NF-YC                        | 52           | 11             | 16             | 15                 | 15           | 7                  |
| TCP                          | 38           | 22             | 35             | 32                 | 27           | 9                  |
| GRF                          | 37           | 14             | 19             | 10                 | 22           | 6                  |
| HB-other                     | 37           | 10             | 15             | 8                  | 15           | 15                 |
| CAMTA                        | 34           | 5              | 9              | 8                  | 8            | 12                 |
| E2F/DP                       | 25           | 6              | 10             | 12                 | 9            | 7                  |
| Nin-like                     | 25           | 10             | 49             | 20                 | 19           | 22                 |
| RAV                          | 25           | 4              | 4              | 6                  | 4            | 3                  |
| Trihelix                     | 24           | 34             | 60             | 33                 | 32           | 45                 |
| DBB                          | 23           | 7              | 16             | 12                 | 11           | 6                  |
| BES1                         | 16           | 5              | 14             | 11                 | 5            | 10                 |
| HB-PHD                       | 15           | 2              | 4              | 2                  | 1            | 2                  |
| Whirly                       | 11           | 2              | 4              | 4                  | 2            | 2                  |
| CPP                          | 10           | 6              | 19             | 10                 | 20           | 8                  |
| FAR1                         | 9            | 21             | 54             | 20                 | 71           | 0                  |
| GeBP                         | 9            | 6              | 11             | 29                 | 24           | 4                  |

|              |             |             |             |             |             |             |
|--------------|-------------|-------------|-------------|-------------|-------------|-------------|
| BBR/BPC      | 7           | 5           | 16          | 17          | 7           | 2           |
| SAP          | 7           | 1           | 1           | 1           | 0           | 2           |
| EIL          | 6           | 4           | 8           | 6           | 12          | 10          |
| Dof          | 5           | 25          | 48          | 45          | 39          | 41          |
| LFY          | 3           | 1           | 1           | 1           | 2           | 4           |
| bZIP         | 2           | 51          | 106         | 101         | 99          | 39          |
| NZZ/SPL      | 2           | 0           | 2           | 1           | 0           | 2           |
| S1Fa-like    | 2           | 1           | 2           | 4           | 3           | 0           |
| NF-X1        | 1           | 2           | 5           | 2           | 3           | 4           |
| <b>Total</b> | <b>5978</b> | <b>1297</b> | <b>2621</b> | <b>2036</b> | <b>2057</b> | <b>1007</b> |

**Table S25.** Genes involved in phytohormone metabolism, signaling and regulatory events represented in the *H. brasiliensis* genome

| <b>Biological Processes</b>                                                          | <i>Hevea</i> | <i>Ricinus</i> | <i>Populus</i> | <i>Arabidopsis</i> | <i>Oryza</i> | <i>Selaginella</i> |
|--------------------------------------------------------------------------------------|--------------|----------------|----------------|--------------------|--------------|--------------------|
| <b>Auxin Homeostasis And Signaling</b>                                               |              |                |                |                    |              |                    |
| TIR1/AFB auxin receptor protein PintaTIR1                                            | 11           | 3              | 6              | 4                  | 3            | 1                  |
| Auxin response factors                                                               | 20           | 19             | 43             | 25                 | 33           | 14                 |
| Aux/IAA repressors                                                                   | 6            | 18             | 35             | 29                 | 35           | 4                  |
| Auxin binding proteins                                                               | 6            | 1              | 1              | 1                  | 2            | 1                  |
| PIN auxin efflux carriers                                                            | 16           | 7              | 18             | 7                  | 6            | 4                  |
| AUX1/LAX auxin influx transporters                                                   | 12           | 4              | 8              | 4                  | 5            | 3                  |
| YUCCA/FLOOZY monooxygenases                                                          | 13           | 4              | 5              | 7                  | 2            | 2                  |
| Class II GH3 IAA amidosynthetases                                                    | 11           | 5              | 9              | 17                 | 8            | 1                  |
| IRL1/ILL IAA amidohydrolases                                                         | 18           | 7              | 12             | 7                  | 11           | 2                  |
| Small Auxin-Up RNA (SAUR)                                                            | 21           | 9              | 99             | 81                 | 56           | 28                 |
| Topless/Topless Related                                                              | 17           | 6              | 11             | 5                  | 3            | 2                  |
| TAA/TAR (Tryptophan Aminotransferase-Related)                                        | 6            | 1              | 1              | 1                  | -            | -                  |
| <b>Total</b>                                                                         | <b>157</b>   | <b>84</b>      | <b>248</b>     | <b>188</b>         | <b>164</b>   | <b>62</b>          |
| <b>Cytokinin Biosynthetic Pathway</b>                                                |              |                |                |                    |              |                    |
| Adenylate Isopentenyltransferase/ Adenosine Phosphate-Isopentenyltransferases (Ipts) | 8            | 5              | 8              | 8                  | 10           | -                  |
| Trans-Zeatin Riboside Monophosphate Phosphoribohydrolase (LOG)                       | 21           | 34             | 31             | 20                 | 32           | 4                  |
| Adenosine Kinase (AK)                                                                | 11           | 1              | 2              | 2                  | 2            | 1                  |
| Adenine Phosphoribosyltransferase (APRT)                                             | 10           | 4              | 4              | 5                  | 6            | 1                  |
| CKX/ Cytokinin Oxidase/ Dehydrogenase                                                | 13           | 6              | 9              | 7                  | 11           | 1                  |
| Zeatin O-Glucosyltransferase                                                         | 37           | 70             | 149            | 60                 | 148          | 15                 |
| <b>Total</b>                                                                         | <b>100</b>   | <b>120</b>     | <b>203</b>     | <b>102</b>         | <b>209</b>   | <b>22</b>          |
| <b>Gibberellin Biosynthetic Pathway</b>                                              |              |                |                |                    |              |                    |
| CYP88A                                                                               | 8            | 1              | 2              | 2                  | 1            | 2                  |
| GA20ox (17)                                                                          | 5            | 1              | 2              | 2                  | 1            | -                  |
| GA3ox                                                                                | 1            | 2              | -              | 1                  | -            | -                  |
| GA2ox                                                                                | 9            | 5              | 4              | 2                  | 2            | -                  |
| GA7ox                                                                                | 1            | -              | -              | 1                  | -            | -                  |
| GID                                                                                  | 4            | 36             | 67             | 20                 | 70           | 18                 |
| DELLA                                                                                | 5            | 2              | 4              | 5                  | 1            | 1                  |
| GASA                                                                                 | 7            | 14             | 21             | 15                 | 6            | 6                  |
| SPINDLY                                                                              | 1            | 1              | 2              | 1                  | 1            | -                  |
| <b>Total</b>                                                                         | <b>41</b>    | <b>62</b>      | <b>102</b>     | <b>49</b>          | <b>82</b>    | <b>27</b>          |
| <b>Ethylene Biosynthesis</b>                                                         |              |                |                |                    |              |                    |
| s-adenosylmethionine synthetase                                                      | 9            | 5              | 9              | 7                  | 10           | 5                  |
| 1-aminocyclopropane-1-carboxylate deaminase                                          | 3            | 1              | 1              | 1                  | 1            | 1                  |
| 1ACC synthase                                                                        | 5            | 7              | 12             | 13                 | 6            | 4                  |
| 1-aminocyclopropane-1-carboxylate oxidase                                            | 13           | 8              | 17             | 22                 | 12           | 4                  |
| Ethylene Receptor                                                                    | 6            | 16             | 13             | 6                  | 13           | 7                  |
| constitutive triple response-1                                                       | 11           | 2              | 3              | 1                  | 2            | 1                  |
| ethylene insensitive 2                                                               | 5            | 1              | 2              | 1                  | 2            | 2                  |
| ethylene responsive factor (ERF)                                                     | 246          | 92             | 172            | 117                | 121          | 39                 |
| Ethylene overproducer 1 (ETO1)                                                       | 4            | 3              | 8              | 4                  | 5            | 4                  |
| <b>Total</b>                                                                         | <b>302</b>   | <b>135</b>     | <b>237</b>     | <b>172</b>         | <b>172</b>   | <b>67</b>          |

| <b>Jasmonic Acid Metabolic Pathway</b>                           |    |    |    |    |    |    |
|------------------------------------------------------------------|----|----|----|----|----|----|
| Lox (Lipoxygenase)                                               | 10 | 14 | 26 | 6  | 24 | 34 |
| Aos (Allene oxide synthase)                                      | 4  | 2  | 9  | 2  | 5  | 17 |
| Aoc (allene oxide cyclase)                                       | 5  | 2  | 3  | 4  | 1  | 2  |
| Opr7                                                             | 13 | 10 | 12 | 10 | 11 | 14 |
| Total                                                            | 32 | 28 | 50 | 22 | 41 | 67 |
| <b>Brassinosteroid Signaling</b>                                 |    |    |    |    |    |    |
| DET2- probable steroid reductase                                 | 2  | 1  | 1  | 1  | 2  | 1  |
| CYP90B1, DWF4                                                    | 4  | 1  | 2  | 1  | 1  | -  |
| CYP90A1, CPD                                                     | 7  | 1  | 2  | 1  | 2  | 1  |
| CYP90C1, ROT3                                                    | 8  | 1  | 1  | 1  | -  | -  |
| CYP85A1, BR6OX1                                                  | 4  | 1  | 3  | 2  | 1  | -  |
| CYP90D1, D1                                                      | 3  | 1  | 2  | 1  | 2  | 2  |
| CYP85A2                                                          | 7  | 1  | 3  | 2  | 1  | -  |
| Total                                                            | 35 | 7  | 14 | 9  | 9  | 4  |
| <b>Salicylic Acid Associated Genes</b>                           |    |    |    |    |    |    |
| PAL                                                              | 5  | 7  | 6  | 4  | 13 | 2  |
| PBS3                                                             | 2  | 1  | 2  | 3  | 2  | 2  |
| 3-phosphoshikimate 1-<br>carboxyvinyltransferase (EPSP synthase) | 3  | 2  | 3  | 3  | 1  | 4  |
| Total                                                            | 10 | 10 | 11 | 10 | 16 | 8  |
| <b>Nitric Oxide Related Genes</b>                                |    |    |    |    |    |    |
| Nos                                                              | 4  | 1  | 1  | 1  | 1  | 2  |
| SOD                                                              | 9  | 8  | 16 | 18 | 14 | 14 |
| Cat (Catalase)                                                   | 7  | 2  | 4  | 7  | 6  | 10 |
| Total                                                            | 20 | 11 | 21 | 26 | 21 | 26 |

**Table S26.** Circadian clock and light signaling gene families from *Hevea* in comparison to *Populus* and *Arabidopsis*

| <b>Gene name</b>            | <b><i>Hevea</i></b> | <b><i>Populus</i></b> | <b><i>Arabidopsis</i></b> |
|-----------------------------|---------------------|-----------------------|---------------------------|
| PRR/CCT                     | 11                  | 8                     | 7                         |
| ZTL/FKF1                    | 10                  | 5                     | 3                         |
| CCA1/LHY                    | 11                  | 4                     | 3                         |
| RVE/ERP1                    | 8                   | 3                     | 5                         |
| PHOT                        | 13                  | 3                     | 2                         |
| ELF3                        | 7                   | 2                     | 1                         |
| GI (Gigantea)               | 5                   | 2                     | 1                         |
| SRR1                        | 24                  | 2                     | 2                         |
| ELF4                        | 2                   | 5                     | 4                         |
| TIC/TKL                     | 4                   | 2                     | 1                         |
| TEJ                         | 2                   | 2                     | 1                         |
| PHY                         | 7                   | 5                     | 5                         |
| CRY/cryptochrome/photolyase | 9                   | 5                     | 3                         |
| PIF/PIL                     | 8                   | 5                     | 6                         |
| Casein kinase               | 18                  | 15                    | 16                        |
| COP                         | 2                   | 1                     | 1                         |
| SPA                         | 4                   | 2                     | 2                         |
| HY5/HYH                     | 5                   | 2                     | 1                         |
| DET                         | 2                   | 2                     | 1                         |
| FUSCA                       | 2                   | 2                     | 1                         |
| <b>Total</b>                | <b>154</b>          | <b>77</b>             | <b>66</b>                 |

**Table S27.** Major genes involved in carotenoid biosynthesis in *H. brasiliensis* and *A. thaliana*

| <b>Gene Name</b> | <b>Gene Description</b>                                           | <b><i>Hevea</i></b> | <b><i>Arabidopsis</i></b> |
|------------------|-------------------------------------------------------------------|---------------------|---------------------------|
| GGPPS            | Geranylgeranyl diphosphate synthase                               | 6                   | 13                        |
| IDI              | Isopentenyl diphosphate isomerase                                 | 3                   | 2                         |
| PSY              | Phytoene synthase                                                 | 5                   | 1                         |
| PDS              | Phytoene desaturase                                               | 9                   | 1                         |
| ZDS              | Zeta-carotene desaturase                                          | 2                   | 1                         |
| CrtIso           | Carotene isomerase                                                | 2                   | 1                         |
| LCYb             | Lycopene $\beta$ -cyclase                                         | 2                   | 1                         |
| LCYe             | Lycopene epsilon cyclase                                          | 3                   | 1                         |
| CHYeP450         | Carotenoid epsilon ring 3-hydroxylase of the cytochrome P450 type | 2                   | 1                         |
| CHYbP450         | Carotene beta-ring hydroxylase/ oxygen binding                    | 3                   | 1                         |
| CHYb             | Carotenoid beta-ring 3-hydroxylase                                | 5                   | 2                         |
| ZEP              | Zeaxanthin epoxidase                                              | 2                   | 1                         |
| VDE              | Violaxanthin de-epoxidase                                         | 2                   | 1                         |
| NSY              | Neoxanthin synthase                                               | 2                   | 1                         |
| <b>Total</b>     |                                                                   | <b>48</b>           | <b>28</b>                 |
